# Supplementary material for: Ferroptosis-related gene transferrin receptor protein 1 expression correlates with the prognosis and tumor immune microenvironment in cervical cancer
Source: PeerJ. 2024 Aug 6;12:e17842. doi: 10.7717/peerj.17842 (PMC11313409; doi:10.7717/peerj.17842)
Supplement: Supplemental Information 1 [file peerj-12-17842-s001.xlsx]

## Sheet: Sheet2
Normal	Tumor
0.804939	4.14633
1.14267	2.28707
1.05239	2.10719
