# Supplementary material for: Ferroptosis-related gene transferrin receptor protein 1 expression correlates with the prognosis and tumor immune microenvironment in cervical cancer
Source: PeerJ. 2024 Aug 6;12:e17842. doi: 10.7717/peerj.17842 (PMC11313409; doi:10.7717/peerj.17842)
Supplement: Supplemental Information 2 [file peerj-12-17842-s002.xlsx]

## Sheet: Sheet1
	ONTOLOGY	ID	Description	GeneRatio	BgRatio	pvalue	p.adjust	qvalue	geneID	Count
GO:0007059	BP	GO:0007059	chromosome segregation	64/600	435/18614	1.03857e-24	4.58424e-21	4.1335e-21	SMARCD3/DUSP1/KLHDC8B/CDC20/TPX2/UBE2C/MYBL2/TOP2A/CCNB2/NUSAP1/CCNB1/KIFC1/AURKB/BIRC5/ZWINT/DLGAP5/PTTG1/MKI67/KIF11/CDT1/AURKA/CENPF/BUB1B/NUF2/TTK/HJURP/PRC1/FAM83D/OIP5/TACC3/KIF23/SKA1/ASPM/CHMP4C/ECT2/CCNE1/CENPK/TRIP13/SPC24/KIF15/RMI2/SMC4/MND1/NCAPD2/INCENP/CENPH/NCAPD3/GPSM2/PSRC1/CENPQ/CCNE2/ACTL6A/NDE1/SLC25A5/EML4/KIFC2/SYCP2/NAA50/FBXO5/SYCE2/RNF212/MISP/REC8/MAPK15	64
GO:0098813	BP	GO:0098813	nuclear chromosome segregation	56/600	339/18614	3.0616e-24	6.75695e-21	6.09258e-21	SMARCD3/DUSP1/KLHDC8B/CDC20/TPX2/UBE2C/MYBL2/TOP2A/CCNB2/NUSAP1/CCNB1/KIFC1/AURKB/BIRC5/ZWINT/DLGAP5/PTTG1/KIF11/CDT1/AURKA/CENPF/BUB1B/NUF2/TTK/PRC1/FAM83D/TACC3/KIF23/ASPM/CHMP4C/ECT2/CCNE1/CENPK/TRIP13/SPC24/KIF15/RMI2/SMC4/MND1/NCAPD2/INCENP/NCAPD3/PSRC1/CENPQ/CCNE2/ACTL6A/EML4/KIFC2/SYCP2/NAA50/FBXO5/SYCE2/RNF212/MISP/REC8/MAPK15	56
GO:0000280	BP	GO:0000280	nuclear division	61/600	450/18614	1.05995e-21	1.55954e-18	1.4062e-18	MSX1/RPS6KA2/DUSP1/KLHDC8B/CAV2/CDC20/TPX2/UBE2C/MYBL2/TOP2A/CCNB2/NUSAP1/CCNB1/KIFC1/AURKB/BIRC5/CKS2/ZWINT/DLGAP5/PTTG1/MKI67/KIF11/CDT1/AURKA/CENPF/BUB1B/NUF2/TTK/PRC1/ANLN/PKMYT1/RAD51AP1/RAD51/KIF23/ASPM/CHMP4C/CCNE1/CENPK/TRIP13/SPC24/KIF15/SMC4/MND1/NCAPD2/INCENP/NCAPD3/PSRC1/CCNE2/NDE1/EML4/KIFC2/SYCP2/NAA50/FBXO5/TDRKH/SYCE2/CDC25B/RNF212/MISP/REC8/MAPK15	61
GO:0048285	BP	GO:0048285	organelle fission	62/600	497/18614	3.70132e-20	4.08441e-17	3.68281e-17	MSX1/RPS6KA2/DUSP1/KLHDC8B/CAV2/CDC20/TPX2/UBE2C/MYBL2/TOP2A/CCNB2/NUSAP1/CCNB1/KIFC1/AURKB/BIRC5/CKS2/ZWINT/DLGAP5/PTTG1/MKI67/KIF11/CDT1/AURKA/CENPF/BUB1B/NUF2/TTK/PRC1/ANLN/PKMYT1/RAD51AP1/RAD51/KIF23/ASPM/CHMP4C/CCNE1/CENPK/TRIP13/SPC24/KIF15/SMC4/MND1/NCAPD2/INCENP/NCAPD3/PSRC1/CCNE2/NDE1/EML4/KIFC2/SYCP2/NAA50/FBXO5/TDRKH/SYCE2/CDC25B/RNF212/MISP/UCP2/REC8/MAPK15	62
GO:0000819	BP	GO:0000819	sister chromatid segregation	42/600	250/18614	1.02416e-18	9.04127e-16	8.1523e-16	SMARCD3/DUSP1/CDC20/TPX2/UBE2C/MYBL2/TOP2A/NUSAP1/CCNB1/KIFC1/AURKB/BIRC5/ZWINT/DLGAP5/KIF11/CDT1/CENPF/BUB1B/NUF2/TTK/PRC1/TACC3/KIF23/CHMP4C/CENPK/TRIP13/SPC24/KIF15/RMI2/SMC4/NCAPD2/INCENP/NCAPD3/PSRC1/ACTL6A/EML4/KIFC2/NAA50/FBXO5/MISP/REC8/MAPK15	42
GO:0044772	BP	GO:0044772	mitotic cell cycle phase transition	57/600	467/18614	3.72488e-18	2.74027e-15	2.47084e-15	PBX1/SMARCD3/ZFP36L2/FOXO4/DUSP1/CDC20/UBE2C/RRM2/CCNB2/CCNB1/AURKB/BIRC5/CKS2/ZWINT/DLGAP5/CDT1/AURKA/FOXM1/CENPF/BUB1B/NUF2/CCNA2/EZH2/TTK/ANLN/E2F1/CDKN3/PKMYT1/GTSE1/IQGAP3/TACC3/CHMP4C/CDKN2A/CCNE1/CDC25A/TRIP13/SPC24/CKS1B/E2F2/TOPBP1/E2F7/INCENP/TICRR/CLSPN/SKP2/RRM1/CCNE2/ACTL6A/EIF4EBP1/BARD1/PIDD1/PRKDC/FBXO5/CCNO/CDC25B/CDKN2C/MUC1	57
GO:0140014	BP	GO:0140014	mitotic nuclear division	42/600	286/18614	1.60481e-16	1.01195e-13	9.12448e-14	DUSP1/KLHDC8B/CAV2/CDC20/TPX2/UBE2C/MYBL2/NUSAP1/CCNB1/KIFC1/AURKB/BIRC5/ZWINT/DLGAP5/MKI67/KIF11/CDT1/AURKA/CENPF/BUB1B/NUF2/TTK/PRC1/ANLN/PKMYT1/KIF23/CHMP4C/CENPK/TRIP13/SPC24/KIF15/SMC4/NCAPD2/INCENP/NCAPD3/PSRC1/NDE1/EML4/KIFC2/NAA50/FBXO5/MISP	42
GO:0000070	BP	GO:0000070	mitotic sister chromatid segregation	34/600	199/18614	1.30683e-15	7.21046e-13	6.5015e-13	DUSP1/CDC20/TPX2/MYBL2/NUSAP1/CCNB1/KIFC1/AURKB/BIRC5/ZWINT/DLGAP5/KIF11/CDT1/CENPF/BUB1B/NUF2/TTK/PRC1/KIF23/CHMP4C/CENPK/TRIP13/SPC24/KIF15/SMC4/NCAPD2/INCENP/NCAPD3/PSRC1/EML4/KIFC2/NAA50/FBXO5/MISP	34
GO:1902850	BP	GO:1902850	microtubule cytoskeleton organization involved in mitosis	29/600	161/18614	4.04582e-14	1.98425e-11	1.78915e-11	CDC20/TPX2/MYBL2/NUSAP1/CCNB1/KIFC1/AURKB/BIRC5/DLGAP5/KIF11/AURKA/CENPA/NUF2/TTK/PRC1/TACC3/KIF23/CHMP4C/SAPCD2/KIF15/FAM110A/INCENP/CENPH/GPSM2/PSRC1/NDE1/STMN1/KIFC2/MISP	29
GO:0051983	BP	GO:0051983	regulation of chromosome segregation	26/600	131/18614	7.87709e-14	3.47695e-11	3.13508e-11	SMARCD3/DUSP1/CDC20/UBE2C/CCNB1/AURKB/BIRC5/ZWINT/DLGAP5/MKI67/CDT1/CENPF/BUB1B/NUF2/TTK/TACC3/TRIP13/SPC24/RMI2/SMC4/NCAPD2/INCENP/NCAPD3/ACTL6A/FBXO5/MAPK15	26
GO:1905818	BP	GO:1905818	regulation of chromosome separation	20/600	73/18614	9.35695e-14	3.75469e-11	3.38552e-11	DUSP1/CDC20/CCNB1/AURKB/BIRC5/ZWINT/DLGAP5/CDT1/CENPF/BUB1B/NUF2/TTK/TRIP13/SPC24/SMC4/NCAPD2/INCENP/NCAPD3/FBXO5/MAPK15	20
GO:0007051	BP	GO:0007051	spindle organization	31/600	198/18614	2.77703e-13	1.02149e-10	9.21049e-11	CDC20/TPX2/MYBL2/CCNB2/CCNB1/KIFC1/AURKB/BIRC5/DLGAP5/KIF11/AURKA/NUF2/TTK/PRC1/TACC3/KIF23/ASPM/CHMP4C/KIF15/FAM110A/INCENP/CENPH/GPSM2/PSRC1/CEP72/STMN1/KIFC2/EZR/FBXO5/MISP/MAPK15	31
GO:1901990	BP	GO:1901990	regulation of mitotic cell cycle phase transition	42/600	357/18614	4.05892e-13	1.37816e-10	1.24265e-10	PBX1/SMARCD3/ZFP36L2/FOXO4/DUSP1/CDC20/UBE2C/RRM2/CCNB1/AURKB/BIRC5/ZWINT/DLGAP5/CDT1/AURKA/CENPF/BUB1B/NUF2/EZH2/TTK/ANLN/E2F1/GTSE1/CHMP4C/CDKN2A/CDC25A/TRIP13/SPC24/TOPBP1/E2F7/INCENP/TICRR/CLSPN/RRM1/ACTL6A/BARD1/PIDD1/PRKDC/FBXO5/CDC25B/CDKN2C/MUC1	42
GO:0051304	BP	GO:0051304	chromosome separation	20/600	79/18614	4.8181e-13	1.48725e-10	1.34102e-10	DUSP1/CDC20/CCNB1/AURKB/BIRC5/ZWINT/DLGAP5/CDT1/CENPF/BUB1B/NUF2/TTK/TRIP13/SPC24/SMC4/NCAPD2/INCENP/NCAPD3/FBXO5/MAPK15	20
GO:0007052	BP	GO:0007052	mitotic spindle organization	25/600	130/18614	5.0541e-13	1.48725e-10	1.34102e-10	CDC20/TPX2/MYBL2/CCNB1/KIFC1/AURKB/BIRC5/DLGAP5/KIF11/AURKA/NUF2/TTK/PRC1/TACC3/KIF23/CHMP4C/KIF15/FAM110A/INCENP/CENPH/GPSM2/PSRC1/STMN1/KIFC2/MISP	25
GO:0033045	BP	GO:0033045	regulation of sister chromatid segregation	22/600	104/18614	1.696e-12	4.67885e-10	4.21881e-10	SMARCD3/DUSP1/CDC20/UBE2C/CCNB1/AURKB/BIRC5/ZWINT/DLGAP5/CDT1/CENPF/BUB1B/NUF2/TTK/TACC3/TRIP13/SPC24/RMI2/INCENP/ACTL6A/FBXO5/MAPK15	22
GO:1901987	BP	GO:1901987	regulation of cell cycle phase transition	47/600	457/18614	2.19275e-12	5.6934e-10	5.1336e-10	PBX1/ATP2B4/SMARCD3/ZFP36L2/FOXO4/DUSP1/CDC20/UBE2C/RRM2/CCNB1/AURKB/BIRC5/ZWINT/DLGAP5/CDT1/AURKA/CENPF/BUB1B/NUF2/EZH2/TTK/ANLN/E2F1/FAM83D/RAD51/GTSE1/CHMP4C/CDKN2A/CDC25A/TRIP13/SPC24/WDR76/TOPBP1/E2F7/INCENP/TICRR/CLSPN/RRM1/ACTL6A/BARD1/PIDD1/PRKDC/FBXO5/CDC25B/CDKN2C/MAPK15/MUC1	47
GO:1903046	BP	GO:1903046	meiotic cell cycle process	31/600	215/18614	2.62538e-12	6.43802e-10	5.80501e-10	MSX1/RPS6KA2/CDC20/TOP2A/CCNB2/CKS2/PTTG1/AURKA/BUB1B/NUF2/TTK/RAD51AP1/RAD51/ASPM/CCNE1/CDC25A/TRIP13/SMC4/MND1/NCAPD2/INCENP/NCAPD3/CCNE2/SYCP2/FBXO5/TDRKH/SYCE2/CDC25B/RNF212/REC8/MAPK15	31
GO:0044784	BP	GO:0044784	metaphase/anaphase transition of cell cycle	21/600	98/18614	4.18144e-12	9.71414e-10	8.75902e-10	SMARCD3/DUSP1/CDC20/UBE2C/CCNB1/AURKB/BIRC5/ZWINT/DLGAP5/CDT1/CENPF/BUB1B/NUF2/TTK/TACC3/TRIP13/SPC24/INCENP/ACTL6A/FBXO5/MAPK15	21
GO:0033046	BP	GO:0033046	negative regulation of sister chromatid segregation	15/600	48/18614	1.44801e-11	2.77892e-09	2.50569e-09	DUSP1/CDC20/CCNB1/AURKB/BIRC5/ZWINT/CDT1/CENPF/BUB1B/NUF2/TTK/TRIP13/SPC24/INCENP/FBXO5	15
GO:0033048	BP	GO:0033048	negative regulation of mitotic sister chromatid segregation	15/600	48/18614	1.44801e-11	2.77892e-09	2.50569e-09	DUSP1/CDC20/CCNB1/AURKB/BIRC5/ZWINT/CDT1/CENPF/BUB1B/NUF2/TTK/TRIP13/SPC24/INCENP/FBXO5	15
GO:0045841	BP	GO:0045841	negative regulation of mitotic metaphase/anaphase transition	15/600	48/18614	1.44801e-11	2.77892e-09	2.50569e-09	DUSP1/CDC20/CCNB1/AURKB/BIRC5/ZWINT/CDT1/CENPF/BUB1B/NUF2/TTK/TRIP13/SPC24/INCENP/FBXO5	15
GO:2000816	BP	GO:2000816	negative regulation of mitotic sister chromatid separation	15/600	48/18614	1.44801e-11	2.77892e-09	2.50569e-09	DUSP1/CDC20/CCNB1/AURKB/BIRC5/ZWINT/CDT1/CENPF/BUB1B/NUF2/TTK/TRIP13/SPC24/INCENP/FBXO5	15
GO:1902099	BP	GO:1902099	regulation of metaphase/anaphase transition of cell cycle	20/600	94/18614	1.563e-11	2.87461e-09	2.59197e-09	SMARCD3/DUSP1/CDC20/UBE2C/CCNB1/AURKB/BIRC5/ZWINT/DLGAP5/CDT1/CENPF/BUB1B/NUF2/TTK/TRIP13/SPC24/INCENP/ACTL6A/FBXO5/MAPK15	20
GO:0007091	BP	GO:0007091	metaphase/anaphase transition of mitotic cell cycle	20/600	95/18614	1.92109e-11	3.297e-09	2.97283e-09	SMARCD3/DUSP1/CDC20/UBE2C/CCNB1/AURKB/BIRC5/ZWINT/DLGAP5/CDT1/CENPF/BUB1B/NUF2/TTK/TACC3/TRIP13/SPC24/INCENP/ACTL6A/FBXO5	20
GO:0007093	BP	GO:0007093	mitotic cell cycle checkpoint signaling	24/600	140/18614	1.94205e-11	3.297e-09	2.97283e-09	FOXO4/DUSP1/CDC20/CCNB1/AURKB/BIRC5/ZWINT/CDT1/CENPF/BUB1B/NUF2/TTK/GTSE1/CHMP4C/TRIP13/SPC24/TOPBP1/INCENP/TICRR/CLSPN/BARD1/PIDD1/PRKDC/MUC1	24
GO:0010965	BP	GO:0010965	regulation of mitotic sister chromatid separation	16/600	58/18614	2.53816e-11	4.1321e-09	3.72582e-09	DUSP1/CDC20/CCNB1/AURKB/BIRC5/ZWINT/DLGAP5/CDT1/CENPF/BUB1B/NUF2/TTK/TRIP13/SPC24/INCENP/FBXO5	16
GO:0051985	BP	GO:0051985	negative regulation of chromosome segregation	15/600	50/18614	2.80841e-11	4.1321e-09	3.72582e-09	DUSP1/CDC20/CCNB1/AURKB/BIRC5/ZWINT/CDT1/CENPF/BUB1B/NUF2/TTK/TRIP13/SPC24/INCENP/FBXO5	15
GO:1902100	BP	GO:1902100	negative regulation of metaphase/anaphase transition of cell cycle	15/600	50/18614	2.80841e-11	4.1321e-09	3.72582e-09	DUSP1/CDC20/CCNB1/AURKB/BIRC5/ZWINT/CDT1/CENPF/BUB1B/NUF2/TTK/TRIP13/SPC24/INCENP/FBXO5	15
GO:1905819	BP	GO:1905819	negative regulation of chromosome separation	15/600	50/18614	2.80841e-11	4.1321e-09	3.72582e-09	DUSP1/CDC20/CCNB1/AURKB/BIRC5/ZWINT/CDT1/CENPF/BUB1B/NUF2/TTK/TRIP13/SPC24/INCENP/FBXO5	15
GO:1901991	BP	GO:1901991	negative regulation of mitotic cell cycle phase transition	28/600	194/18614	2.96504e-11	4.22183e-09	3.80673e-09	ZFP36L2/FOXO4/DUSP1/CDC20/CCNB1/AURKB/BIRC5/ZWINT/CDT1/CENPF/BUB1B/NUF2/EZH2/TTK/GTSE1/CHMP4C/TRIP13/SPC24/TOPBP1/E2F7/INCENP/TICRR/CLSPN/BARD1/PIDD1/PRKDC/FBXO5/MUC1	28
GO:0140013	BP	GO:0140013	meiotic nuclear division	28/600	196/18614	3.8024e-11	5.24494e-09	4.72924e-09	MSX1/RPS6KA2/CDC20/TOP2A/CCNB2/CKS2/PTTG1/AURKA/BUB1B/NUF2/TTK/RAD51AP1/RAD51/ASPM/CCNE1/TRIP13/SMC4/MND1/INCENP/CCNE2/SYCP2/FBXO5/TDRKH/SYCE2/CDC25B/RNF212/REC8/MAPK15	28
GO:0051783	BP	GO:0051783	regulation of nuclear division	24/600	145/18614	4.18527e-11	5.59811e-09	5.04769e-09	MSX1/RPS6KA2/DUSP1/CAV2/CDC20/NUSAP1/CCNB1/AURKB/BIRC5/ZWINT/DLGAP5/MKI67/CDT1/AURKA/CENPF/BUB1B/NUF2/TTK/PKMYT1/RAD51AP1/TRIP13/SPC24/INCENP/FBXO5	24
GO:0051306	BP	GO:0051306	mitotic sister chromatid separation	16/600	61/18614	5.88491e-11	7.64e-09	6.88881e-09	DUSP1/CDC20/CCNB1/AURKB/BIRC5/ZWINT/DLGAP5/CDT1/CENPF/BUB1B/NUF2/TTK/TRIP13/SPC24/INCENP/FBXO5	16
GO:0033047	BP	GO:0033047	regulation of mitotic sister chromatid segregation	15/600	53/18614	7.13072e-11	8.77213e-09	7.90962e-09	DUSP1/CDC20/CCNB1/AURKB/BIRC5/ZWINT/CDT1/CENPF/BUB1B/NUF2/TTK/TRIP13/SPC24/INCENP/FBXO5	15
GO:0030071	BP	GO:0030071	regulation of mitotic metaphase/anaphase transition	19/600	91/18614	7.15443e-11	8.77213e-09	7.90962e-09	SMARCD3/DUSP1/CDC20/UBE2C/CCNB1/AURKB/BIRC5/ZWINT/DLGAP5/CDT1/CENPF/BUB1B/NUF2/TTK/TRIP13/SPC24/INCENP/ACTL6A/FBXO5	19
GO:0000075	BP	GO:0000075	cell cycle checkpoint signaling	27/600	188/18614	7.52884e-11	8.98171e-09	8.0986e-09	FOXO4/DUSP1/CDC20/CCNB1/AURKB/BIRC5/ZWINT/CDT1/CENPF/BUB1B/NUF2/TTK/E2F1/RAD51/GTSE1/CHMP4C/TRIP13/SPC24/WDR76/TOPBP1/INCENP/TICRR/CLSPN/BARD1/PIDD1/PRKDC/MUC1	27
GO:0051784	BP	GO:0051784	negative regulation of nuclear division	16/600	63/18614	1.00146e-10	1.12191e-08	1.0116e-08	RPS6KA2/DUSP1/CDC20/CCNB1/AURKB/BIRC5/ZWINT/CDT1/CENPF/BUB1B/NUF2/TTK/TRIP13/SPC24/INCENP/FBXO5	16
GO:0007094	BP	GO:0007094	mitotic spindle assembly checkpoint signaling	14/600	46/18614	1.0421e-10	1.12191e-08	1.0116e-08	DUSP1/CDC20/CCNB1/AURKB/BIRC5/ZWINT/CDT1/CENPF/BUB1B/NUF2/TTK/TRIP13/SPC24/INCENP	14
GO:0071173	BP	GO:0071173	spindle assembly checkpoint signaling	14/600	46/18614	1.0421e-10	1.12191e-08	1.0116e-08	DUSP1/CDC20/CCNB1/AURKB/BIRC5/ZWINT/CDT1/CENPF/BUB1B/NUF2/TTK/TRIP13/SPC24/INCENP	14
GO:0071174	BP	GO:0071174	mitotic spindle checkpoint signaling	14/600	46/18614	1.0421e-10	1.12191e-08	1.0116e-08	DUSP1/CDC20/CCNB1/AURKB/BIRC5/ZWINT/CDT1/CENPF/BUB1B/NUF2/TTK/TRIP13/SPC24/INCENP	14
GO:0140694	BP	GO:0140694	non-membrane-bounded organelle assembly	40/600	390/18614	1.1011e-10	1.15721e-08	1.04343e-08	FLNC/ASB2/CDC20/TPX2/MYBL2/CCNB2/KIFC1/AURKB/BIRC5/DLGAP5/KIF11/AURKA/CENPF/CENPA/PRC1/ANLN/KIF23/ASPM/CHMP4C/CENPK/KIF15/CDS1/INCENP/CENPH/GPSM2/GRB7/CEP72/KIFC2/EZR/NOP2/PRKDC/FBXO5/KRT19/PLS1/NEBL/SMIM22/KRT8/MISP/MAPK15/FSCN1	40
GO:0031577	BP	GO:0031577	spindle checkpoint signaling	14/600	47/18614	1.4407e-10	1.45915e-08	1.31568e-08	DUSP1/CDC20/CCNB1/AURKB/BIRC5/ZWINT/CDT1/CENPF/BUB1B/NUF2/TTK/TRIP13/SPC24/INCENP	14
GO:0007088	BP	GO:0007088	regulation of mitotic nuclear division	21/600	117/18614	1.45452e-10	1.45915e-08	1.31568e-08	DUSP1/CAV2/CDC20/NUSAP1/CCNB1/AURKB/BIRC5/ZWINT/DLGAP5/MKI67/CDT1/AURKA/CENPF/BUB1B/NUF2/TTK/PKMYT1/TRIP13/SPC24/INCENP/FBXO5	21
GO:0045839	BP	GO:0045839	negative regulation of mitotic nuclear division	15/600	56/18614	1.69548e-10	1.66307e-08	1.49955e-08	DUSP1/CDC20/CCNB1/AURKB/BIRC5/ZWINT/CDT1/CENPF/BUB1B/NUF2/TTK/TRIP13/SPC24/INCENP/FBXO5	15
GO:0051321	BP	GO:0051321	meiotic cell cycle	33/600	284/18614	1.95841e-10	1.87922e-08	1.69445e-08	MSX1/RPS6KA2/DUSP1/CDC20/TOP2A/CCNB2/CKS2/PTTG1/AURKA/BUB1B/NUF2/TTK/RAD51AP1/RAD51/ASPM/CCNE1/CDC25A/TRIP13/SMC4/MND1/NCAPD2/INCENP/NCAPD3/CCNE2/SYCP2/FBXO5/TDRKH/SMC1B/SYCE2/CDC25B/RNF212/REC8/MAPK15	33
GO:0033044	BP	GO:0033044	regulation of chromosome organization	30/600	250/18614	6.06616e-10	5.69702e-08	5.13687e-08	SMARCD3/DUSP1/CDC20/UBE2C/TOP2A/CCNB1/AURKB/BIRC5/ZWINT/DLGAP5/CDT1/CENPF/BUB1B/NUF2/TTK/MCM2/TACC3/TRIP13/SPC24/RMI2/SMC4/NCAPD2/INCENP/PIF1/NCAPD3/DDX11/ACTL6A/CCT5/FBXO5/MAPK15	30
GO:2001251	BP	GO:2001251	negative regulation of chromosome organization	18/600	93/18614	8.40937e-10	7.73311e-08	6.97277e-08	DUSP1/CDC20/TOP2A/CCNB1/AURKB/BIRC5/ZWINT/CDT1/CENPF/BUB1B/NUF2/TTK/MCM2/TRIP13/SPC24/INCENP/PIF1/FBXO5	18
GO:0045786	BP	GO:0045786	negative regulation of cell cycle	39/600	404/18614	1.11128e-09	1.00106e-07	9.02635e-08	RPS6KA2/RHOB/NR4A1/ZFP36L2/FOXO4/HPGD/DUSP1/HOXD10/CDC20/CCNB1/AURKB/BIRC5/ZWINT/CDT1/CENPF/BUB1B/NUF2/EZH2/TTK/E2F1/RAD51/GTSE1/CHMP4C/CDKN2A/TRIP13/SPC24/WDR76/E2F8/TOPBP1/E2F7/INCENP/TICRR/CLSPN/BARD1/PIDD1/PRKDC/FBXO5/CDKN2C/MUC1	39
GO:0000281	BP	GO:0000281	mitotic cytokinesis	17/600	84/18614	1.2007e-09	1.05998e-07	9.55759e-08	SNX9/RHOB/KLHDC8B/NUSAP1/AURKB/BIRC5/CEP55/CENPA/KIF20A/ANLN/KIF23/CHMP4C/ECT2/CKAP2/INCENP/RTKN/STMN1	17
GO:1901988	BP	GO:1901988	negative regulation of cell cycle phase transition	31/600	274/18614	1.352e-09	1.17014e-07	1.05509e-07	ZFP36L2/FOXO4/DUSP1/CDC20/CCNB1/AURKB/BIRC5/ZWINT/CDT1/CENPF/BUB1B/NUF2/EZH2/TTK/E2F1/RAD51/GTSE1/CHMP4C/TRIP13/SPC24/WDR76/TOPBP1/E2F7/INCENP/TICRR/CLSPN/BARD1/PIDD1/PRKDC/FBXO5/MUC1	31
GO:0045132	BP	GO:0045132	meiotic chromosome segregation	19/600	109/18614	1.83362e-09	1.55646e-07	1.40342e-07	TOP2A/CCNB2/PTTG1/AURKA/BUB1B/NUF2/TTK/ASPM/CCNE1/TRIP13/SMC4/MND1/CCNE2/SYCP2/FBXO5/SYCE2/RNF212/REC8/MAPK15	19
GO:0010948	BP	GO:0010948	negative regulation of cell cycle process	33/600	317/18614	3.35019e-09	2.79014e-07	2.51581e-07	RPS6KA2/ZFP36L2/FOXO4/DUSP1/CDC20/CCNB1/AURKB/BIRC5/ZWINT/CDT1/CENPF/BUB1B/NUF2/EZH2/TTK/E2F1/RAD51/GTSE1/CHMP4C/TRIP13/SPC24/WDR76/E2F8/TOPBP1/E2F7/INCENP/TICRR/CLSPN/BARD1/PIDD1/PRKDC/FBXO5/MUC1	33
GO:0045930	BP	GO:0045930	negative regulation of mitotic cell cycle	28/600	243/18614	5.6818e-09	4.64435e-07	4.1877e-07	ZFP36L2/FOXO4/DUSP1/CDC20/CCNB1/AURKB/BIRC5/ZWINT/CDT1/CENPF/BUB1B/NUF2/EZH2/TTK/GTSE1/CHMP4C/TRIP13/SPC24/TOPBP1/E2F7/INCENP/TICRR/CLSPN/BARD1/PIDD1/PRKDC/FBXO5/MUC1	28
GO:0051225	BP	GO:0051225	spindle assembly	20/600	131/18614	7.50818e-09	6.00972e-07	5.41882e-07	CDC20/TPX2/MYBL2/CCNB2/KIFC1/AURKB/BIRC5/KIF11/AURKA/PRC1/KIF23/ASPM/CHMP4C/KIF15/INCENP/GPSM2/KIFC2/FBXO5/MISP/MAPK15	20
GO:0090068	BP	GO:0090068	positive regulation of cell cycle process	29/600	262/18614	7.62447e-09	6.00972e-07	5.41882e-07	PBX1/MSX1/UBE2C/RRM2/NUSAP1/CCNB1/AURKB/BIRC5/DLGAP5/CDT1/AURKA/EZH2/FAM83D/RAD51AP1/KIF23/ECT2/CDC25A/SMC4/NCAPD2/E2F8/E2F7/INCENP/NCAPD3/GPSM2/RRM1/DDX11/FBXO5/CDC25B/MAPK15	29
GO:0006261	BP	GO:0006261	DNA-templated DNA replication	22/600	160/18614	9.86875e-09	7.64222e-07	6.89081e-07	CDT1/MCM2/RAD51/RECQL4/GINS2/HMGA1/MCM10/CCNE1/PCNA/CHTF18/E2F8/RFC4/TOPBP1/E2F7/TICRR/GINS3/RRM1/DDX11/CCNE2/RFC3/BARD1/FBXO5	22
GO:0045787	BP	GO:0045787	positive regulation of cell cycle	33/600	354/18614	5.04177e-08	3.83696e-06	3.4597e-06	CITED2/PBX1/MSX1/UBE2C/RRM2/NUSAP1/CCNB1/AURKB/BIRC5/DLGAP5/CDT1/AURKA/EZH2/FAM83D/RAD51AP1/KIF23/ECT2/CDC25A/SMC4/NCAPD2/E2F8/E2F7/INCENP/NCAPD3/GPSM2/PSRC1/RRM1/DDX11/FOXA1/EIF4EBP1/FBXO5/CDC25B/MAPK15	33
GO:0090307	BP	GO:0090307	mitotic spindle assembly	14/600	72/18614	5.99508e-08	4.46577e-06	4.02668e-06	CDC20/TPX2/MYBL2/KIFC1/AURKB/BIRC5/KIF11/PRC1/KIF23/CHMP4C/KIF15/INCENP/KIFC2/MISP	14
GO:0061982	BP	GO:0061982	meiosis I cell cycle process	19/600	134/18614	6.07038e-08	4.46577e-06	4.02668e-06	TOP2A/CCNB2/CKS2/PTTG1/AURKA/RAD51AP1/RAD51/CCNE1/CDC25A/TRIP13/MND1/CCNE2/SYCP2/FBXO5/SYCE2/CDC25B/RNF212/REC8/MAPK15	19
GO:0006260	BP	GO:0006260	DNA replication	28/600	278/18614	1.0553e-07	7.63622e-06	6.8854e-06	RRM2/CDT1/CCNA2/MCM2/RAD51/FAM111B/CHAF1A/RECQL4/GINS2/HMGA1/MCM10/CCNE1/PCNA/RMI2/CHTF18/E2F8/RFC4/TOPBP1/E2F7/TICRR/GINS3/RRM1/DDX11/CCNE2/ACTL6A/RFC3/BARD1/FBXO5	28
GO:0061640	BP	GO:0061640	cytoskeleton-dependent cytokinesis	17/600	113/18614	1.24857e-07	8.88901e-06	8.01501e-06	SNX9/RHOB/KLHDC8B/NUSAP1/AURKB/BIRC5/CEP55/CENPA/KIF20A/ANLN/KIF23/CHMP4C/ECT2/CKAP2/INCENP/RTKN/STMN1	17
GO:0000910	BP	GO:0000910	cytokinesis	22/600	185/18614	1.40339e-07	9.74126e-06	8.78346e-06	SNX9/RHOB/KLHDC8B/NUSAP1/AURKB/BIRC5/CEP55/AURKA/CENPA/KIF20A/PRC1/ANLN/KIF23/CHMP4C/ECT2/CKAP2/E2F8/E2F7/INCENP/RTKN/STMN1/CDC25B	22
GO:1905820	BP	GO:1905820	positive regulation of chromosome separation	9/600	28/18614	1.41242e-07	9.74126e-06	8.78346e-06	AURKB/BIRC5/DLGAP5/CDT1/SMC4/NCAPD2/INCENP/NCAPD3/MAPK15	9
GO:0051656	BP	GO:0051656	establishment of organelle localization	37/600	445/18614	1.50546e-07	1.02232e-05	9.21804e-06	GAB2/FYCO1/GATA2/STXBP1/SDCBP/FES/MYO1C/NUSAP1/CCNB1/KIFC1/AURKB/BIRC5/CDT1/CENPF/CENPA/NUF2/LMNB1/FAM83D/AP1M2/CHMP4C/SAPCD2/INCENP/GPSM2/LMNB2/PSRC1/MYO5B/SYK/CENPQ/LLGL2/NDE1/EML4/EZR/MYO6/CNIH2/MISP/MYO1B/MAPK15	37
GO:0050000	BP	GO:0050000	chromosome localization	15/600	92/18614	2.33891e-07	1.56424e-05	1.41043e-05	CCNB1/KIFC1/AURKB/BIRC5/DLGAP5/CDT1/CENPF/NUF2/FAM83D/CHMP4C/INCENP/PSRC1/CENPQ/NDE1/EML4	15
GO:0051383	BP	GO:0051383	kinetochore organization	8/600	22/18614	2.38541e-07	1.57152e-05	1.41701e-05	DLGAP5/CDT1/CENPF/CENPA/NUF2/CENPK/SMC4/CENPH	8
GO:0090329	BP	GO:0090329	regulation of DNA-templated DNA replication	12/600	58/18614	2.59284e-07	1.68306e-05	1.51757e-05	CDT1/MCM2/GINS2/PCNA/CHTF18/E2F8/RFC4/E2F7/TICRR/GINS3/RFC3/FBXO5	12
GO:0000086	BP	GO:0000086	G2/M transition of mitotic cell cycle	18/600	136/18614	3.88484e-07	2.48517e-05	2.24082e-05	PBX1/FOXO4/CCNB1/AURKB/AURKA/FOXM1/CENPF/CCNA2/PKMYT1/CHMP4C/CDC25A/TOPBP1/TICRR/CLSPN/RRM1/BARD1/FBXO5/CDC25B	18
GO:0044839	BP	GO:0044839	cell cycle G2/M phase transition	19/600	151/18614	4.12928e-07	2.6038e-05	2.34779e-05	PBX1/FOXO4/CCNB2/CCNB1/AURKB/AURKA/FOXM1/CENPF/CCNA2/PKMYT1/CHMP4C/CDC25A/TOPBP1/TICRR/CLSPN/RRM1/BARD1/FBXO5/CDC25B	19
GO:0051310	BP	GO:0051310	metaphase plate congression	13/600	72/18614	4.40807e-07	2.73479e-05	2.4659e-05	CCNB1/KIFC1/AURKB/BIRC5/CDT1/CENPF/NUF2/FAM83D/CHMP4C/INCENP/PSRC1/CENPQ/EML4	13
GO:0051303	BP	GO:0051303	establishment of chromosome localization	14/600	84/18614	4.46092e-07	2.73479e-05	2.4659e-05	CCNB1/KIFC1/AURKB/BIRC5/CDT1/CENPF/NUF2/FAM83D/CHMP4C/INCENP/PSRC1/CENPQ/NDE1/EML4	14
GO:0070192	BP	GO:0070192	chromosome organization involved in meiotic cell cycle	13/600	75/18614	7.20334e-07	4.35555e-05	3.9273e-05	BUB1B/RAD51/CCNE1/TRIP13/SMC4/MND1/NCAPD2/NCAPD3/CCNE2/SYCP2/SYCE2/RNF212/REC8	13
GO:0051445	BP	GO:0051445	regulation of meiotic cell cycle	12/600	64/18614	8.00458e-07	4.77462e-05	4.30516e-05	MSX1/RPS6KA2/DUSP1/CDC20/TTK/RAD51AP1/ASPM/CDC25A/TRIP13/FBXO5/CDC25B/MAPK15	12
GO:0010389	BP	GO:0010389	regulation of G2/M transition of mitotic cell cycle	15/600	101/18614	8.12895e-07	4.78416e-05	4.31376e-05	PBX1/FOXO4/CCNB1/AURKB/AURKA/CENPF/CHMP4C/CDC25A/TOPBP1/TICRR/CLSPN/RRM1/BARD1/FBXO5/CDC25B	15
GO:0007127	BP	GO:0007127	meiosis I	17/600	129/18614	8.67032e-07	5.03563e-05	4.54051e-05	TOP2A/CCNB2/CKS2/PTTG1/AURKA/RAD51AP1/RAD51/CCNE1/TRIP13/MND1/CCNE2/SYCP2/FBXO5/SYCE2/CDC25B/RNF212/REC8	17
GO:0002064	BP	GO:0002064	epithelial cell development	22/600	210/18614	1.26317e-06	7.24109e-05	6.52912e-05	ESR1/RILPL2/GATA2/SOX18/RAPGEF3/GSTM3/EPAS1/FRMD6/ADAMTSL4/TYMS/RAB25/ST14/KLF5/FOXA1/EZR/FASN/TJP2/POF1B/HPSE/TJP3/TFCP2L1/FOXJ1	22
GO:0051984	BP	GO:0051984	positive regulation of chromosome segregation	8/600	27/18614	1.43591e-06	8.12577e-05	7.32682e-05	CCNB1/AURKB/BIRC5/CDT1/SMC4/NCAPD2/INCENP/NCAPD3	8
GO:1900262	BP	GO:1900262	regulation of DNA-directed DNA polymerase activity	6/600	13/18614	1.54755e-06	8.53863e-05	7.69908e-05	GINS2/PCNA/CHTF18/RFC4/GINS3/RFC3	6
GO:1900264	BP	GO:1900264	positive regulation of DNA-directed DNA polymerase activity	6/600	13/18614	1.54755e-06	8.53863e-05	7.69908e-05	GINS2/PCNA/CHTF18/RFC4/GINS3/RFC3	6
GO:0032392	BP	GO:0032392	DNA geometric change	13/600	83/18614	2.3771e-06	0.000129537	0.000116801	TOP2A/MCM2/RAD51/RECQL4/GINS2/HMGA1/CHTF18/RFC4/HMGB3/GINS3/DDX11/RFC3/HMGB2	13
GO:0051231	BP	GO:0051231	spindle elongation	6/600	14/18614	2.6344e-06	0.000141808	0.000127865	AURKB/BIRC5/KIF11/PRC1/KIF23/INCENP	6
GO:1902749	BP	GO:1902749	regulation of cell cycle G2/M phase transition	15/600	112/18614	3.09401e-06	0.000164542	0.000148363	PBX1/FOXO4/CCNB1/AURKB/AURKA/CENPF/CHMP4C/CDC25A/TOPBP1/TICRR/CLSPN/RRM1/BARD1/FBXO5/CDC25B	15
GO:0032506	BP	GO:0032506	cytokinetic process	9/600	40/18614	3.95707e-06	0.000207935	0.00018749	SNX9/KLHDC8B/AURKB/CEP55/KIF20A/ANLN/CHMP4C/ECT2/RTKN	9
GO:0071103	BP	GO:0071103	DNA conformation change	13/600	90/18614	6.00911e-06	0.000312049	0.000281368	TOP2A/MCM2/RAD51/RECQL4/GINS2/HMGA1/CHTF18/RFC4/HMGB3/GINS3/DDX11/RFC3/HMGB2	13
GO:0048732	BP	GO:0048732	gland development	33/600	441/18614	7.009e-06	0.000359741	0.00032437	TGFBR3/SOCS2/ESR1/CITED2/PBX1/ACAT1/MSX1/GATA2/HOXD9/IRS2/SEMA3C/GLI3/SNAI2/CCNB2/AURKA/CDH1/TYMS/EZH2/IQGAP3/ESRP2/PCNA/DDR1/E2F8/E2F7/SLC29A2/FOXA1/FKBP4/FASN/PCSK9/FA2H/UCP2/TFCP2L1/RAP1GAP	33
GO:0008608	BP	GO:0008608	attachment of spindle microtubules to kinetochore	9/600	43/18614	7.48641e-06	0.000379828	0.000342482	CCNB1/AURKB/BIRC5/CDT1/NUF2/ECT2/SPC24/INCENP/EML4	9
GO:0042770	BP	GO:0042770	signal transduction in response to DNA damage	19/600	184/18614	8.19055e-06	0.00041083	0.000370436	MSX1/FOXO4/PLA2R1/SNAI2/FOXM1/E2F1/RAD51/GTSE1/WDR76/TOPBP1/E2F7/TICRR/CLSPN/SMYD2/BARD1/PIDD1/MYO6/PRKDC/MUC1	19
GO:0007143	BP	GO:0007143	female meiotic nuclear division	8/600	35/18614	1.2122e-05	0.000601195	0.000542083	TOP2A/CCNB2/AURKA/TTK/TRIP13/SYCP2/FBXO5/CDC25B	8
GO:0007080	BP	GO:0007080	mitotic metaphase plate congression	10/600	57/18614	1.23766e-05	0.000607001	0.000547319	CCNB1/KIFC1/AURKB/BIRC5/CDT1/NUF2/CHMP4C/INCENP/PSRC1/EML4	10
GO:0044771	BP	GO:0044771	meiotic cell cycle phase transition	5/600	11/18614	1.34567e-05	0.000645627	0.000582147	CCNB2/TTK/CDC25A/CDC25B/MAPK15	5
GO:0051256	BP	GO:0051256	mitotic spindle midzone assembly	5/600	11/18614	1.34567e-05	0.000645627	0.000582147	AURKB/BIRC5/PRC1/KIF23/INCENP	5
GO:0051782	BP	GO:0051782	negative regulation of cell division	6/600	18/18614	1.45835e-05	0.000692166	0.00062411	TXNIP/AURKB/ASPM/CHMP4C/E2F8/E2F7	6
GO:0044843	BP	GO:0044843	cell cycle G1/S phase transition	24/600	281/18614	1.49545e-05	0.000702225	0.000633179	ATP2B4/SMARCD3/RRM2/CCNA2/EZH2/E2F1/CDKN3/FAM83D/GTSE1/IQGAP3/CDKN2A/CCNE1/CDC25A/E2F2/E2F7/SKP2/RRM1/CCNE2/ACTL6A/EIF4EBP1/PIDD1/PRKDC/CDKN2C/MUC1	24
GO:1901976	BP	GO:1901976	regulation of cell cycle checkpoint	9/600	47/18614	1.61268e-05	0.0007493	0.000675627	DUSP1/CCNB1/AURKB/BIRC5/CDT1/RAD51/WDR76/INCENP/BARD1	9
GO:0006270	BP	GO:0006270	DNA replication initiation	8/600	37/18614	1.87861e-05	0.000863771	0.000778842	CDT1/MCM2/MCM10/CCNE1/TOPBP1/TICRR/GINS3/CCNE2	8
GO:0010639	BP	GO:0010639	negative regulation of organelle organization	28/600	362/18614	1.90131e-05	0.000865192	0.000780124	RPS6KA2/DUSP1/CDC20/TPX2/TOP2A/CCNB1/AURKB/BIRC5/ZWINT/CDT1/CENPF/BUB1B/NUF2/TTK/MCM2/CKAP2/TRIP13/SPC24/INCENP/PIF1/SPTBN2/SLC25A5/STMN1/FKBP4/FBXO5/TFRC/RHPN1/RHPN2	28
GO:0030865	BP	GO:0030865	cortical cytoskeleton organization	9/600	48/18614	1.92868e-05	0.000868694	0.000783281	EHD2/ANLN/ECT2/RTKN/LLGL2/RAC3/TRPV4/EZR/PLS1	9
GO:0000022	BP	GO:0000022	mitotic spindle elongation	5/600	12/18614	2.24566e-05	0.00100125	0.000902803	AURKB/BIRC5/PRC1/KIF23/INCENP	5
GO:0034508	BP	GO:0034508	centromere complex assembly	7/600	29/18614	2.93599e-05	0.00129595	0.00116852	DLGAP5/CENPF/CENPA/HJURP/OIP5/CENPK/CENPH	7
GO:0032508	BP	GO:0032508	DNA duplex unwinding	11/600	77/18614	3.45411e-05	0.00150955	0.00136112	TOP2A/MCM2/RAD51/RECQL4/GINS2/HMGA1/CHTF18/RFC4/GINS3/DDX11/RFC3	11
GO:0007144	BP	GO:0007144	female meiosis I	5/600	13/18614	3.55248e-05	0.00152239	0.00137271	CCNB2/AURKA/TRIP13/FBXO5/CDC25B	5
GO:0032530	BP	GO:0032530	regulation of microvillus organization	5/600	13/18614	3.55248e-05	0.00152239	0.00137271	KLF5/EZR/PLS1/RAP1GAP/FSCN1	5
GO:0006268	BP	GO:0006268	DNA unwinding involved in DNA replication	6/600	21/18614	3.92484e-05	0.00161909	0.00145989	MCM2/RAD51/RECQL4/GINS2/HMGA1/GINS3	6
GO:0090231	BP	GO:0090231	regulation of spindle checkpoint	6/600	21/18614	3.92484e-05	0.00161909	0.00145989	DUSP1/CCNB1/AURKB/BIRC5/CDT1/INCENP	6
GO:0090266	BP	GO:0090266	regulation of mitotic cell cycle spindle assembly checkpoint	6/600	21/18614	3.92484e-05	0.00161909	0.00145989	DUSP1/CCNB1/AURKB/BIRC5/CDT1/INCENP	6
GO:1903504	BP	GO:1903504	regulation of mitotic spindle checkpoint	6/600	21/18614	3.92484e-05	0.00161909	0.00145989	DUSP1/CCNB1/AURKB/BIRC5/CDT1/INCENP	6
GO:2000241	BP	GO:2000241	regulation of reproductive process	19/600	206/18614	4.0361e-05	0.00164957	0.00148738	ESR1/CITED2/MSX1/RPS6KA2/STXBP1/DUSP1/CDC20/AURKA/TTK/RAD51AP1/ASPM/CDC25A/TRIP13/SYCP2/FBXO5/CDC25B/AMH/TCP11/MAPK15	19
GO:0032465	BP	GO:0032465	regulation of cytokinesis	12/600	93/18614	4.34034e-05	0.00175764	0.00158482	AURKB/BIRC5/AURKA/KIF20A/PRC1/KIF23/CHMP4C/ECT2/E2F8/E2F7/INCENP/CDC25B	12
GO:0051255	BP	GO:0051255	spindle midzone assembly	5/600	14/18614	5.37973e-05	0.00215874	0.00194648	AURKB/BIRC5/PRC1/KIF23/INCENP	5
GO:0051642	BP	GO:0051642	centrosome localization	7/600	32/18614	5.82148e-05	0.00229429	0.00206871	DLGAP5/AURKA/ASPM/GPSM2/NDE1/EZR/MISP	7
GO:0061842	BP	GO:0061842	microtubule organizing center localization	7/600	32/18614	5.82148e-05	0.00229429	0.00206871	DLGAP5/AURKA/ASPM/GPSM2/NDE1/EZR/MISP	7
GO:0044786	BP	GO:0044786	cell cycle DNA replication	8/600	43/18614	5.95136e-05	0.00232472	0.00209614	CDT1/MCM2/RAD51/PCNA/E2F8/E2F7/GINS3/FBXO5	8
GO:0000082	BP	GO:0000082	G1/S transition of mitotic cell cycle	21/600	251/18614	6.79838e-05	0.00263229	0.00237347	SMARCD3/RRM2/EZH2/E2F1/CDKN3/GTSE1/IQGAP3/CDKN2A/CCNE1/CDC25A/E2F2/E2F7/SKP2/RRM1/CCNE2/ACTL6A/EIF4EBP1/PIDD1/PRKDC/CDKN2C/MUC1	21
GO:0032528	BP	GO:0032528	microvillus organization	6/600	24/18614	8.96452e-05	0.00344082	0.0031025	STK26/KLF5/EZR/PLS1/RAP1GAP/FSCN1	6
GO:0030330	BP	GO:0030330	DNA damage response, signal transduction by p53 class mediator	10/600	72/18614	9.96431e-05	0.00379159	0.00341879	MSX1/PLA2R1/SNAI2/FOXM1/GTSE1/E2F7/SMYD2/PIDD1/MYO6/MUC1	10
GO:0030033	BP	GO:0030033	microvillus assembly	5/600	16/18614	0.000111248	0.00416143	0.00375226	STK26/KLF5/EZR/RAP1GAP/FSCN1	5
GO:0051447	BP	GO:0051447	negative regulation of meiotic cell cycle	5/600	16/18614	0.000111248	0.00416143	0.00375226	RPS6KA2/DUSP1/TTK/TRIP13/FBXO5	5
GO:0006275	BP	GO:0006275	regulation of DNA replication	14/600	136/18614	0.000128699	0.00477375	0.00430438	CDT1/CCNA2/MCM2/GINS2/PCNA/CHTF18/E2F8/RFC4/E2F7/TICRR/GINS3/ACTL6A/RFC3/FBXO5	14
GO:0007292	BP	GO:0007292	female gamete generation	15/600	153/18614	0.000129965	0.00478056	0.00431052	RGS2/RPS6KA2/HPGD/TOP2A/CCNB2/AURKA/TTK/ASPM/TRIP13/SYCP2/FBXO5/YBX2/CDC25B/AMH/REC8	15
GO:0001892	BP	GO:0001892	embryonic placenta development	11/600	89/18614	0.000133242	0.00486059	0.00438268	CITED2/GATA2/EPAS1/SPINT1/ST14/E2F8/E2F7/PHLDA2/OVOL2/KRT19/KRT8	11
GO:1901989	BP	GO:1901989	positive regulation of cell cycle phase transition	13/600	121/18614	0.000144386	0.00522394	0.0047103	PBX1/UBE2C/RRM2/CCNB1/DLGAP5/CDT1/EZH2/FAM83D/CDC25A/RRM1/FBXO5/CDC25B/MAPK15	13
GO:0070507	BP	GO:0070507	regulation of microtubule cytoskeleton organization	15/600	155/18614	0.000150285	0.00539315	0.00486288	ARL2/FES/TPX2/TACC3/SKA1/CHMP4C/CKAP2/KIF15/GPSM2/PSRC1/TRPV4/STMN1/FKBP4/OCLN/MAPK15	15
GO:0051382	BP	GO:0051382	kinetochore assembly	5/600	17/18614	0.000153437	0.00541817	0.00488544	DLGAP5/CENPF/CENPA/CENPK/CENPH	5
GO:1901970	BP	GO:1901970	positive regulation of mitotic sister chromatid separation	5/600	17/18614	0.000153437	0.00541817	0.00488544	AURKB/BIRC5/DLGAP5/CDT1/INCENP	5
GO:0072331	BP	GO:0072331	signal transduction by p53 class mediator	16/600	173/18614	0.000155755	0.00545638	0.00491989	MSX1/PLA2R1/SNAI2/AURKB/AURKA/FOXM1/E2F1/GTSE1/E2F2/E2F7/SMYD2/TP73/NOP2/PIDD1/MYO6/MUC1	16
GO:0035825	BP	GO:0035825	homologous recombination	9/600	64/18614	0.000200359	0.00690924	0.0062299	TOP2A/RAD51AP1/RAD51/TRIP13/MND1/TOPBP1/BARD1/RNF212/REC8	9
GO:0045143	BP	GO:0045143	homologous chromosome segregation	9/600	64/18614	0.000200359	0.00690924	0.0062299	PTTG1/CCNE1/TRIP13/MND1/CCNE2/SYCP2/SYCE2/RNF212/REC8	9
GO:0051988	BP	GO:0051988	regulation of attachment of spindle microtubules to kinetochore	5/600	18/18614	0.000206842	0.00707754	0.00638165	CCNB1/AURKB/BIRC5/ECT2/INCENP	5
GO:0010971	BP	GO:0010971	positive regulation of G2/M transition of mitotic cell cycle	6/600	28/18614	0.000224846	0.00763439	0.00688375	PBX1/CCNB1/CDC25A/RRM1/FBXO5/CDC25B	6
GO:1904375	BP	GO:1904375	regulation of protein localization to cell periphery	13/600	128/18614	0.000253806	0.00855192	0.00771106	PID1/ATP2B4/LRP1/PRNP/SAPCD2/ARHGEF16/NETO2/GPSM2/EZR/PRKCI/ATP2C1/PLS1/MISP	13
GO:0030866	BP	GO:0030866	cortical actin cytoskeleton organization	7/600	40/18614	0.000257905	0.00862417	0.00777621	EHD2/ANLN/ECT2/RTKN/LLGL2/EZR/PLS1	7
GO:0000079	BP	GO:0000079	regulation of cyclin-dependent protein serine/threonine kinase activity	12/600	112/18614	0.000264415	0.0087754	0.00791258	CCNB2/CCNB1/CCNA2/CDKN3/PKMYT1/CDKN2A/CCNE1/CDC25A/PSRC1/CCNE2/CCNO/CDKN2C	12
GO:0045931	BP	GO:0045931	positive regulation of mitotic cell cycle	13/600	129/18614	0.000274117	0.00896339	0.00808208	PBX1/UBE2C/RRM2/CCNB1/DLGAP5/CDT1/AURKA/CDC25A/RRM1/FOXA1/EIF4EBP1/FBXO5/CDC25B	13
GO:0007129	BP	GO:0007129	homologous chromosome pairing at meiosis	8/600	53/18614	0.000274141	0.00896339	0.00808208	CCNE1/TRIP13/MND1/CCNE2/SYCP2/SYCE2/RNF212/REC8	8
GO:0051987	BP	GO:0051987	positive regulation of attachment of spindle microtubules to kinetochore	4/600	11/18614	0.000294374	0.00948444	0.00855189	CCNB1/AURKB/BIRC5/INCENP	4
GO:0072697	BP	GO:0072697	protein localization to cell cortex	4/600	11/18614	0.000294374	0.00948444	0.00855189	SAPCD2/GPSM2/EZR/MISP	4
GO:1904377	BP	GO:1904377	positive regulation of protein localization to cell periphery	9/600	68/18614	0.000319857	0.0102308	0.00922488	ATP2B4/LRP1/PRNP/ARHGEF16/GPSM2/EZR/PRKCI/ATP2C1/PLS1	9
GO:0001556	BP	GO:0001556	oocyte maturation	6/600	30/18614	0.000335494	0.0106537	0.00960622	RPS6KA2/AURKA/TRIP13/FBXO5/CDC25B/REC8	6
GO:0031570	BP	GO:0031570	DNA integrity checkpoint signaling	13/600	132/18614	0.000343579	0.0108326	0.00976747	FOXO4/CDT1/E2F1/RAD51/GTSE1/WDR76/TOPBP1/TICRR/CLSPN/BARD1/PIDD1/PRKDC/MUC1	13
GO:0051054	BP	GO:0051054	positive regulation of DNA metabolic process	22/600	303/18614	0.000354475	0.0110968	0.0100058	SMARCD3/CLCF1/AURKB/CDT1/FOXM1/RAD51AP1/RAD51/GINS2/PCNA/CHTF18/E2F8/RFC4/E2F7/GINS3/DDX11/ACTL6A/RFC3/CCT5/PRKDC/TFRC/MAPK15/EYA2	22
GO:1990778	BP	GO:1990778	protein localization to cell periphery	24/600	345/18614	0.000365476	0.0113134	0.010201	PID1/RAMP1/CD81/RILPL2/ATP2B4/STXBP1/TMEM150A/LRP1/EHD2/TSPAN5/PRNP/CDH1/SAPCD2/ARHGEF16/NETO2/MAP7/GPSM2/ZDHHC23/KRT18/EZR/PRKCI/ATP2C1/PLS1/MISP	24
GO:1904029	BP	GO:1904029	regulation of cyclin-dependent protein kinase activity	12/600	116/18614	0.000366519	0.0113134	0.010201	CCNB2/CCNB1/CCNA2/CDKN3/PKMYT1/CDKN2A/CCNE1/CDC25A/PSRC1/CCNE2/CCNO/CDKN2C	12
GO:1902751	BP	GO:1902751	positive regulation of cell cycle G2/M phase transition	6/600	31/18614	0.000404787	0.0124078	0.0111879	PBX1/CCNB1/CDC25A/RRM1/FBXO5/CDC25B	6
GO:0051315	BP	GO:0051315	attachment of mitotic spindle microtubules to kinetochore	5/600	21/18614	0.000453419	0.0138027	0.0124456	AURKB/BIRC5/CDT1/NUF2/INCENP	5
GO:0046785	BP	GO:0046785	microtubule polymerization	10/600	87/18614	0.000482919	0.0146	0.0131645	ARL2/FES/TPX2/PSRC1/NDE1/TRPV4/STMN1/FKBP4/FBXO5/OCLN	10
GO:0031110	BP	GO:0031110	regulation of microtubule polymerization or depolymerization	10/600	88/18614	0.00052942	0.015897	0.014334	ARL2/FES/TPX2/SKA1/CKAP2/PSRC1/TRPV4/STMN1/FKBP4/OCLN	10
GO:0072089	BP	GO:0072089	stem cell proliferation	12/600	121/18614	0.000539315	0.0160847	0.0145032	OSR2/PBX1/SOX18/GLI3/SNAI2/CCNE1/OVOL2/RNF43/EPCAM/SIX2/HMGB2/CDKN2C	12
GO:0040020	BP	GO:0040020	regulation of meiotic nuclear division	6/600	33/18614	0.000576524	0.017079	0.0153998	MSX1/RPS6KA2/CDC20/RAD51AP1/TRIP13/FBXO5	6
GO:2000573	BP	GO:2000573	positive regulation of DNA biosynthetic process	9/600	74/18614	0.000604713	0.0177947	0.0160451	AURKB/GINS2/PCNA/CHTF18/RFC4/GINS3/RFC3/CCT5/MAPK15	9
GO:0000077	BP	GO:0000077	DNA damage checkpoint signaling	12/600	123/18614	0.000625417	0.0182821	0.0164845	FOXO4/E2F1/RAD51/GTSE1/WDR76/TOPBP1/TICRR/CLSPN/BARD1/PIDD1/PRKDC/MUC1	12
GO:1903078	BP	GO:1903078	positive regulation of protein localization to plasma membrane	8/600	60/18614	0.000649682	0.0188664	0.0170114	ATP2B4/LRP1/PRNP/ARHGEF16/EZR/PRKCI/ATP2C1/PLS1	8
GO:0072091	BP	GO:0072091	regulation of stem cell proliferation	10/600	91/18614	0.000691687	0.0199549	0.0179929	OSR2/PBX1/SOX18/GLI3/SNAI2/CCNE1/OVOL2/EPCAM/HMGB2/CDKN2C	10
GO:0002070	BP	GO:0002070	epithelial cell maturation	5/600	23/18614	0.000710843	0.0203744	0.0183711	GATA2/EPAS1/TYMS/FOXA1/TFCP2L1	5
GO:0090224	BP	GO:0090224	regulation of spindle organization	7/600	47/18614	0.000716077	0.020392	0.018387	TPX2/TACC3/CHMP4C/KIF15/GPSM2/PSRC1/MAPK15	7
GO:0051653	BP	GO:0051653	spindle localization	8/600	61/18614	0.000727	0.0205704	0.0185478	NUSAP1/CENPA/ASPM/SAPCD2/GPSM2/LLGL2/NDE1/MISP	8
GO:0120034	BP	GO:0120034	positive regulation of plasma membrane bounded cell projection assembly	11/600	109/18614	0.000785062	0.0220717	0.0199016	CDC42EP2/KCTD17/CDC42EP5/ANLN/PLEK2/EPS8L2/AGRN/EPS8L1/OCLN/MYO3A/FSCN1	11
GO:0031109	BP	GO:0031109	microtubule polymerization or depolymerization	12/600	127/18614	0.000832471	0.0232565	0.0209698	ARL2/FES/TPX2/SKA1/CKAP2/PSRC1/NDE1/TRPV4/STMN1/FKBP4/FBXO5/OCLN	12
GO:0001885	BP	GO:0001885	endothelial cell development	8/600	63/18614	0.000903829	0.0250912	0.0226241	SOX18/RAPGEF3/GSTM3/EZR/FASN/TJP2/HPSE/TJP3	8
GO:0061028	BP	GO:0061028	establishment of endothelial barrier	7/600	49/18614	0.000925251	0.0255254	0.0230156	SOX18/RAPGEF3/EZR/FASN/TJP2/HPSE/TJP3	7
GO:0048469	BP	GO:0048469	cell maturation	15/600	184/18614	0.000939329	0.0257528	0.0232207	GATA2/RPS6KA2/SOX18/EPAS1/AURKA/TYMS/TRIP13/FOXA1/RAC3/FBXO5/AGRN/CDC25B/TCP11/REC8/TFCP2L1	15
GO:0072659	BP	GO:0072659	protein localization to plasma membrane	20/600	285/18614	0.000986199	0.0268709	0.0242288	PID1/RAMP1/CD81/RILPL2/ATP2B4/STXBP1/TMEM150A/LRP1/EHD2/TSPAN5/PRNP/CDH1/ARHGEF16/MAP7/ZDHHC23/KRT18/EZR/PRKCI/ATP2C1/PLS1	20
GO:0006760	BP	GO:0006760	folic acid-containing compound metabolic process	5/600	25/18614	0.00106421	0.0286427	0.0258265	FOLR1/TYMS/DHFR/GGH/MTHFD2	5
GO:0060706	BP	GO:0060706	cell differentiation involved in embryonic placenta development	5/600	25/18614	0.00106421	0.0286427	0.0258265	ST14/E2F8/E2F7/KRT19/KRT8	5
GO:0009263	BP	GO:0009263	deoxyribonucleotide biosynthetic process	4/600	15/18614	0.00109862	0.0286942	0.0258729	RRM2/TYMS/RRM1/DTYMK	4
GO:0009265	BP	GO:0009265	2'-deoxyribonucleotide biosynthetic process	4/600	15/18614	0.00109862	0.0286942	0.0258729	RRM2/TYMS/RRM1/DTYMK	4
GO:0033008	BP	GO:0033008	positive regulation of mast cell activation involved in immune response	4/600	15/18614	0.00109862	0.0286942	0.0258729	GAB2/GATA2/STXBP1/SYK	4
GO:0043306	BP	GO:0043306	positive regulation of mast cell degranulation	4/600	15/18614	0.00109862	0.0286942	0.0258729	GAB2/GATA2/STXBP1/SYK	4
GO:0046385	BP	GO:0046385	deoxyribose phosphate biosynthetic process	4/600	15/18614	0.00109862	0.0286942	0.0258729	RRM2/TYMS/RRM1/DTYMK	4
GO:0032873	BP	GO:0032873	negative regulation of stress-activated MAPK cascade	7/600	51/18614	0.00117978	0.0304534	0.0274591	PER1/PDCD4/DUSP1/FOXM1/PBK/EZR/GSTP1	7
GO:0070303	BP	GO:0070303	negative regulation of stress-activated protein kinase signaling cascade	7/600	51/18614	0.00117978	0.0304534	0.0274591	PER1/PDCD4/DUSP1/FOXM1/PBK/EZR/GSTP1	7
GO:0051446	BP	GO:0051446	positive regulation of meiotic cell cycle	5/600	26/18614	0.00128303	0.0329261	0.0296887	MSX1/RAD51AP1/CDC25A/CDC25B/MAPK15	5
GO:0001890	BP	GO:0001890	placenta development	13/600	152/18614	0.00130365	0.0332548	0.0299851	CITED2/GATA2/EPAS1/SPINT1/ST14/E2F8/E2F7/PHLDA2/OVOL2/KRT19/ITGB8/KRT8/DLX3	13
GO:0009185	BP	GO:0009185	ribonucleoside diphosphate metabolic process	11/600	116/18614	0.00131448	0.0332548	0.0299851	ARL2/PFKM/RRM2/ENO1/RRM1/PKM/GAPDH/DHTKD1/TJP2/GPI/UCP2	11
GO:0048599	BP	GO:0048599	oocyte development	7/600	52/18614	0.00132605	0.0332548	0.0299851	RPS6KA2/AURKA/TRIP13/FBXO5/YBX2/CDC25B/REC8	7
GO:0009132	BP	GO:0009132	nucleoside diphosphate metabolic process	12/600	134/18614	0.00133174	0.0332548	0.0299851	ARL2/PFKM/RRM2/ENO1/RRM1/PKM/GAPDH/DTYMK/DHTKD1/TJP2/GPI/UCP2	12
GO:1901992	BP	GO:1901992	positive regulation of mitotic cell cycle phase transition	10/600	99/18614	0.00133351	0.0332548	0.0299851	PBX1/UBE2C/RRM2/CCNB1/DLGAP5/CDT1/CDC25A/RRM1/FBXO5/CDC25B	10
GO:0060389	BP	GO:0060389	pathway-restricted SMAD protein phosphorylation	8/600	67/18614	0.00136042	0.0337352	0.0304183	TGFBR3/RBPMS/SDCBP/LRP1/TTK/BMP8B/AMH/GDF15	8
GO:0000212	BP	GO:0000212	meiotic spindle organization	4/600	16/18614	0.00142775	0.0350115	0.0315691	CCNB2/AURKA/ASPM/FBXO5	4
GO:0010715	BP	GO:0010715	regulation of extracellular matrix disassembly	4/600	16/18614	0.00142775	0.0350115	0.0315691	LRP1/CST3/DDR1/FSCN1	4
GO:0040001	BP	GO:0040001	establishment of mitotic spindle localization	6/600	39/18614	0.00144209	0.0351678	0.03171	NUSAP1/CENPA/SAPCD2/GPSM2/NDE1/MISP	6
GO:0035136	BP	GO:0035136	forelimb morphogenesis	6/600	40/18614	0.00165106	0.039824	0.0359083	OSR2/MSX1/HOXD9/ZNF358/HOXD10/TFAP2A	6
GO:1901031	BP	GO:1901031	regulation of response to reactive oxygen species	6/600	40/18614	0.00165106	0.039824	0.0359083	SESN1/STK26/SESN3/DHFR/TXN/PYCR1	6
GO:1905477	BP	GO:1905477	positive regulation of protein localization to membrane	10/600	102/18614	0.00167346	0.0401207	0.0361759	CD81/ATP2B4/MYO1C/LRP1/PRNP/ARHGEF16/EZR/PRKCI/ATP2C1/PLS1	10
GO:0120032	BP	GO:0120032	regulation of plasma membrane bounded cell projection assembly	15/600	195/18614	0.00168154	0.0401207	0.0361759	CDC42EP2/KCTD17/CDC42EP5/ANLN/PLEK2/KLF5/EPS8L2/MYO10/AGRN/EPS8L1/OCLN/MYO3A/RAP1GAP/MAPK15/FSCN1	15
GO:0048568	BP	GO:0048568	embryonic organ development	27/600	453/18614	0.00170363	0.0404292	0.036454	RBPMS2/OSR2/CITED2/PBX1/MSX1/GATA2/SOX18/HOXD9/GLI3/ASB2/EPAS1/HOXD10/FOLR1/SPINT1/ST14/TFAP2A/E2F8/E2F7/PHLDA2/OVOL2/IRX5/MYO6/KRT19/PLS1/SIX2/KRT8/MYO3A	27
GO:0048557	BP	GO:0048557	embryonic digestive tract morphogenesis	4/600	17/18614	0.00181984	0.0429561	0.0387325	RBPMS2/GLI3/OVOL2/SIX2	4
GO:0051348	BP	GO:0051348	negative regulation of transferase activity	19/600	279/18614	0.00184512	0.0433211	0.0390616	RGS2/PRKAR1B/IRS2/ZFP36/PIK3IP1/PDCD4/DEPTOR/DUSP1/CDC20/BUB1B/CDKN2A/PIF1/DBNDD1/FBXO5/GSTP1/HMGCR/CAMK2N2/CDKN2C/GPRC5A	19
GO:0060491	BP	GO:0060491	regulation of cell projection assembly	15/600	197/18614	0.00185882	0.0434119	0.0391434	CDC42EP2/KCTD17/CDC42EP5/ANLN/PLEK2/KLF5/EPS8L2/MYO10/AGRN/EPS8L1/OCLN/MYO3A/RAP1GAP/MAPK15/FSCN1	15
GO:0051294	BP	GO:0051294	establishment of spindle orientation	6/600	41/18614	0.00188225	0.0437276	0.0394282	CENPA/SAPCD2/GPSM2/LLGL2/NDE1/MISP	6
GO:0010232	BP	GO:0010232	vascular transport	9/600	87/18614	0.00194066	0.044615	0.0402283	ATP2B4/LRP1/SLC22A3/SLC29A2/MFSD2A/TFRC/SLC1A5/SLC38A1/ABCC3	9
GO:0150104	BP	GO:0150104	transport across blood-brain barrier	9/600	87/18614	0.00194066	0.044615	0.0402283	ATP2B4/LRP1/SLC22A3/SLC29A2/MFSD2A/TFRC/SLC1A5/SLC38A1/ABCC3	9
GO:0009994	BP	GO:0009994	oocyte differentiation	7/600	56/18614	0.00205795	0.0468237	0.0422198	RPS6KA2/AURKA/TRIP13/FBXO5/YBX2/CDC25B/REC8	7
GO:0051293	BP	GO:0051293	establishment of spindle localization	7/600	56/18614	0.00205795	0.0468237	0.0422198	NUSAP1/CENPA/SAPCD2/GPSM2/LLGL2/NDE1/MISP	7
GO:0071900	BP	GO:0071900	regulation of protein serine/threonine kinase activity	23/600	369/18614	0.00207734	0.0470225	0.0423991	RGS2/ATP2B4/PRKAR1B/PDCD4/DUSP1/CCNB2/CCNB1/CCNA2/EZH2/CDKN3/PKMYT1/CDKN2A/CCNE1/CDC25A/PSRC1/SYK/CCNE2/IRAK1/GSTP1/CCNO/HMGCR/CD24/CDKN2C	23
GO:0000076	BP	GO:0000076	DNA replication checkpoint signaling	4/600	18/18614	0.0022807	0.0498683	0.0449651	CDT1/TOPBP1/TICRR/CLSPN	4
GO:0034501	BP	GO:0034501	protein localization to kinetochore	4/600	18/18614	0.0022807	0.0498683	0.0449651	AURKB/CDT1/TTK/CENPQ	4
GO:0043117	BP	GO:0043117	positive regulation of vascular permeability	4/600	18/18614	0.0022807	0.0498683	0.0449651	TRPV4/TJP2/OCLN/TJP3	4
GO:1903083	BP	GO:1903083	protein localization to condensed chromosome	4/600	18/18614	0.0022807	0.0498683	0.0449651	AURKB/CDT1/TTK/CENPQ	4
GO:2000811	BP	GO:2000811	negative regulation of anoikis	4/600	18/18614	0.0022807	0.0498683	0.0449651	PDK4/SNAI2/CEACAM6/CEACAM5	4
GO:0007131	BP	GO:0007131	reciprocal meiotic recombination	7/600	57/18614	0.00228215	0.0498683	0.0449651	TOP2A/RAD51AP1/RAD51/TRIP13/MND1/RNF212/REC8	7
GO:0140527	BP	GO:0140527	reciprocal homologous recombination	7/600	57/18614	0.00228215	0.0498683	0.0449651	TOP2A/RAD51AP1/RAD51/TRIP13/MND1/RNF212/REC8	7
GO:0005819	CC	GO:0005819	spindle	44/617	421/19518	3.59235e-12	1.5614e-09	1.32832e-09	TBL1X/RPS6KA2/SNCG/TUBB6/CDC20/TPX2/NUSAP1/CCNB1/KIFC1/AURKB/DLGAP5/KIF11/AURKA/CENPF/BUB1B/KIF20A/TTK/PRC1/FAM83D/TACC3/KIF23/SKA1/ASPM/HMMR/CHMP4C/ECT2/CKAP2/KIF15/POC1A/FAM110A/TOPBP1/INCENP/GPSM2/PSRC1/DDX11/PLEKHG6/NDE1/SLC25A5/EML4/KIFC2/FBXO5/CDC25B/MISP/MAPK15	44
GO:0000793	CC	GO:0000793	condensed chromosome	34/617	270/19518	6.73015e-12	1.5614e-09	1.32832e-09	TOP2A/CCNB1/AURKB/BIRC5/ZWINT/MKI67/CDT1/CENPF/CENPA/BUB1B/NUF2/TTK/HJURP/CENPU/RAD51/SKA1/CHMP4C/CENPM/CENPK/SPC24/SMC4/NCAPD2/TOPBP1/INCENP/CENPH/NCAPD3/ACTL6A/NDE1/SYCP2/SMC1B/SYCE2/HMGB2/RNF212/REC8	34
GO:0000779	CC	GO:0000779	condensed chromosome, centromeric region	24/617	170/19518	8.41876e-10	1.3021e-07	1.10773e-07	CCNB1/AURKB/BIRC5/ZWINT/CDT1/CENPF/CENPA/BUB1B/NUF2/TTK/HJURP/CENPU/SKA1/CHMP4C/CENPM/CENPK/SPC24/NCAPD2/INCENP/CENPH/NCAPD3/ACTL6A/NDE1/REC8	24
GO:0000775	CC	GO:0000775	chromosome, centromeric region	29/617	249/19518	1.54703e-09	1.79455e-07	1.52667e-07	TOP2A/CCNB1/AURKB/BIRC5/ZWINT/CDT1/CENPF/CENPA/BUB1B/NUF2/EZH2/TTK/HJURP/CENPU/OIP5/SKA1/CHMP4C/CENPM/CENPK/SPC24/SMC4/NCAPD2/INCENP/CENPH/NCAPD3/ACTL6A/NDE1/SMC1B/REC8	29
GO:0098687	CC	GO:0098687	chromosomal region	37/617	390/19518	2.92393e-09	2.71341e-07	2.30837e-07	TOP2A/CCNB1/AURKB/BIRC5/ZWINT/CDT1/CENPF/CENPA/BUB1B/NUF2/EZH2/TTK/HJURP/MCM2/CENPU/OIP5/RAD51AP1/RAD51/SKA1/RECQL4/CHMP4C/CENPM/PCNA/CENPK/SPC24/SMC4/NCAPD2/INCENP/PIF1/CENPH/NCAPD3/THOC3/ACTL6A/NDE1/PRKDC/SMC1B/REC8	37
GO:0000922	CC	GO:0000922	spindle pole	23/617	171/19518	4.92279e-09	3.80696e-07	3.23868e-07	CDC20/TPX2/CCNB1/AURKB/DLGAP5/KIF11/AURKA/CENPF/PRC1/FAM83D/TACC3/ASPM/CKAP2/POC1A/FAM110A/TOPBP1/GPSM2/PSRC1/DDX11/PLEKHG6/NDE1/CDC25B/MISP	23
GO:0000776	CC	GO:0000776	kinetochore	21/617	159/19518	3.16889e-08	2.10052e-06	1.78697e-06	CCNB1/AURKB/BIRC5/ZWINT/CDT1/CENPF/BUB1B/NUF2/TTK/HJURP/CENPU/SKA1/CHMP4C/CENPM/CENPK/SPC24/INCENP/CENPH/ACTL6A/NDE1/REC8	21
GO:0005874	CC	GO:0005874	microtubule	37/617	461/19518	2.2928e-07	1.32983e-05	1.13132e-05	PBXIP1/REEP1/GABARAPL1/CLIP2/MAP1LC3A/TUBB6/NUSAP1/KIFC1/AURKB/KIF11/AURKA/KIF20A/PRC1/GTSE1/KIF23/SKA1/ASPM/CHMP4C/CKAP2/TUBA1C/KIF15/FAM110A/MAP7/HOOK1/INCENP/PSRC1/NDE1/FHDC1/TRPV4/RIBC2/STMN1/FKBP4/EML4/KIFC2/CCT5/HSPH1/MISP	37
GO:0072686	CC	GO:0072686	mitotic spindle	20/617	180/19518	1.1432e-06	5.89382e-05	5.01402e-05	TBL1X/TUBB6/TPX2/NUSAP1/KIFC1/AURKB/KIF11/AURKA/PRC1/FAM83D/TACC3/KIF23/SKA1/ASPM/ECT2/CKAP2/GPSM2/EML4/KIFC2/MISP	20
GO:0000940	CC	GO:0000940	outer kinetochore	6/617	13/19518	1.38287e-06	6.41654e-05	5.45872e-05	CCNB1/CENPF/BUB1B/NUF2/SKA1/SPC24	6
GO:0072687	CC	GO:0072687	meiotic spindle	6/617	15/19518	3.82063e-06	0.000161161	0.000137104	RPS6KA2/AURKA/ASPM/INCENP/FBXO5/MAPK15	6
GO:0005938	CC	GO:0005938	cell cortex	25/617	302/19518	1.23879e-05	0.000478998	0.000407496	SNX9/STXBP1/RAPGEF3/CLIP2/MYO1C/CDH1/ANLN/ECT2/SAPCD2/FAM110A/GPSM2/RTKN/ENO1/MYO5B/LLGL2/SPTBN2/RAC3/TRPV4/MYO10/EZR/MYO6/KRT19/PLS1/MISP/FSCN1	25
GO:0015629	CC	GO:0015629	actin cytoskeleton	34/617	489/19518	1.62222e-05	0.000573606	0.000487981	PDLIM5/SNX9/RAPGEF3/PARVB/MYO1C/ABLIM3/AFAP1L1/SYNPO/CDH1/ANLN/MYH14/TOPBP1/DIAPH3/RTKN/MYO5B/CENPQ/LLGL2/SPTBN2/FHDC1/RAC3/TRPV4/MYO10/EZR/MYO6/CGN/KRT19/PLS1/NEBL/ITPKA/POF1B/MISP/MYO3A/MYO1B/FSCN1	34
GO:0030864	CC	GO:0030864	cortical actin cytoskeleton	11/617	73/19518	1.73071e-05	0.000573606	0.000487981	SNX9/RAPGEF3/CDH1/ANLN/RTKN/LLGL2/SPTBN2/TRPV4/KRT19/PLS1/MISP	11
GO:0000800	CC	GO:0000800	lateral element	5/617	12/19518	2.04553e-05	0.000632752	0.000538298	RAD51/INCENP/SYCP2/SMC1B/REC8	5
GO:0000307	CC	GO:0000307	cyclin-dependent protein kinase holoenzyme complex	9/617	50/19518	2.33886e-05	0.00067827	0.000577022	CCNB2/CCNB1/CKS2/CCNA2/CCNE1/PCNA/CKS1B/CCNE2/CCNO	9
GO:0000228	CC	GO:0000228	nuclear chromosome	20/617	223/19518	2.91633e-05	0.000795988	0.000677167	TOP2A/BIRC5/MCM2/E2F1/RAD51/GINS2/MCM10/PCNA/SMC4/NCAPD2/TOPBP1/INCENP/NCAPD3/GINS3/ACTL6A/SYCP2/SMC1B/SYCE2/RNF212/REC8	20
GO:0000794	CC	GO:0000794	condensed nuclear chromosome	11/617	80/19518	4.17328e-05	0.00107578	0.000915194	RAD51/SMC4/NCAPD2/TOPBP1/INCENP/NCAPD3/SYCP2/SMC1B/SYCE2/RNF212/REC8	11
GO:0031616	CC	GO:0031616	spindle pole centrosome	5/617	14/19518	4.90536e-05	0.00119794	0.00101912	AURKB/DLGAP5/AURKA/NDE1/MISP	5
GO:0030863	CC	GO:0030863	cortical cytoskeleton	12/617	104/19518	0.000109158	0.0023155	0.00196986	SNX9/RAPGEF3/CDH1/ANLN/RTKN/LLGL2/SPTBN2/TRPV4/EZR/KRT19/PLS1/MISP	12
GO:0045171	CC	GO:0045171	intercellular bridge	11/617	89/19518	0.000112569	0.0023155	0.00196986	EHD2/GSTM3/KLHDC8B/TUBB6/TPX2/CEP55/KIF20A/PRC1/FAM83D/SKA1/PRKCI	11
GO:0009925	CC	GO:0009925	basal plasma membrane	21/617	266/19518	0.000118807	0.0023155	0.00196986	CD81/ATP2B4/CA11/MYO1C/SLC40A1/LRP1/HPGD/FOLR1/AURKA/ST14/MAP7/SLC29A2/EZR/TFRC/EPCAM/SLC1A5/CA9/SLC38A1/ABCC3/MUC20/CEACAM5	21
GO:1902554	CC	GO:1902554	serine/threonine protein kinase complex	13/617	121/19518	0.000119459	0.0023155	0.00196986	PRKAR1B/TBKBP1/CCNB2/CCNB1/CKS2/CCNA2/CCNE1/PCNA/CKS1B/CCNE2/PRKDC/CCNO/PRKCI	13
GO:0005884	CC	GO:0005884	actin filament	12/617	105/19518	0.000119767	0.0023155	0.00196986	PDLIM5/MYO1C/DIAPH3/FHDC1/RAC3/EZR/MYO6/PLS1/POF1B/MISP/MYO3A/MYO1B	12
GO:0000795	CC	GO:0000795	synaptonemal complex	7/617	38/19518	0.000163917	0.00292528	0.00248861	RAD51/INCENP/SYCP2/SMC1B/SYCE2/RNF212/REC8	7
GO:0099086	CC	GO:0099086	synaptonemal structure	7/617	38/19518	0.000163917	0.00292528	0.00248861	RAD51/INCENP/SYCP2/SMC1B/SYCE2/RNF212/REC8	7
GO:0016323	CC	GO:0016323	basolateral plasma membrane	19/617	234/19518	0.000172167	0.00295871	0.00251706	CD81/ATP2B4/CA11/SLC40A1/LRP1/HPGD/FOLR1/AURKA/ST14/MAP7/SLC29A2/EZR/TFRC/EPCAM/CA9/SLC38A1/ABCC3/MUC20/CEACAM5	19
GO:0005902	CC	GO:0005902	microvillus	11/617	94/19518	0.000184614	0.00305932	0.00260264	RAPGEF3/MYO1C/PLEKHG6/FOXA1/EZR/CA9/MYO1B/S100P/PTPRH/MUC20/FSCN1	11
GO:0030496	CC	GO:0030496	midbody	17/617	203/19518	0.000259159	0.00414654	0.00352757	KLHDC8B/AURKB/BIRC5/CEP55/AURKA/CENPF/KIF20A/PRC1/ANLN/KIF23/ASPM/CHMP4C/ECT2/INCENP/PSRC1/DDX11/EML4	17
GO:0016459	CC	GO:0016459	myosin complex	8/617	54/19518	0.000274817	0.0042505	0.00361601	MYO1C/MYH14/MYO5B/MYO10/MYO6/CGN/MYO3A/MYO1B	8
GO:0045178	CC	GO:0045178	basal part of cell	21/617	285/19518	0.000306474	0.00458722	0.00390247	CD81/ATP2B4/CA11/MYO1C/SLC40A1/LRP1/HPGD/FOLR1/AURKA/ST14/MAP7/SLC29A2/EZR/TFRC/EPCAM/SLC1A5/CA9/SLC38A1/ABCC3/MUC20/CEACAM5	21
GO:0000152	CC	GO:0000152	nuclear ubiquitin ligase complex	7/617	44/19518	0.000422463	0.00612571	0.0052113	CBX7/CDC20/UBE2C/BUB1B/RAD51/BARD1/CBX2	7
GO:0005875	CC	GO:0005875	microtubule associated complex	14/617	156/19518	0.000442853	0.00622678	0.00529728	CLIP2/KIFC1/AURKB/BIRC5/KIF11/AURKA/KIF20A/KIF23/KIF15/MAP7/INCENP/NDE1/KIFC2/LRP8	14
GO:1902911	CC	GO:1902911	protein kinase complex	13/617	142/19518	0.000580064	0.00791617	0.00673449	PRKAR1B/TBKBP1/CCNB2/CCNB1/CKS2/CCNA2/CCNE1/PCNA/CKS1B/CCNE2/PRKDC/CCNO/PRKCI	13
GO:0005871	CC	GO:0005871	kinesin complex	7/617	47/19518	0.000638896	0.00846993	0.00720559	KIFC1/KIF11/KIF20A/KIF23/KIF15/NDE1/KIFC2	7
GO:0045120	CC	GO:0045120	pronucleus	4/617	14/19518	0.000768648	0.00990702	0.00842816	AURKA/CENPF/CCNA2/EZH2	4
GO:0098858	CC	GO:0098858	actin-based cell projection	17/617	225/19518	0.000843383	0.0105765	0.00899768	RAPGEF3/MYO1C/EPS8L2/PLEKHG6/FOXA1/TRPV4/MYO10/EZR/MYO6/PLS1/CA9/MYO3A/MYO1B/S100P/PTPRH/MUC20/FSCN1	17
GO:0043296	CC	GO:0043296	apical junction complex	13/617	150/19518	0.000970679	0.0118525	0.0100832	SYNPO/FRMD6/CDH1/ECT2/SAPCD2/CGN/TJP2/OCLN/PRKCI/EPCAM/POF1B/TJP3/MAPK15	13
GO:0000792	CC	GO:0000792	heterochromatin	9/617	81/19518	0.00102277	0.0118641	0.0100931	CENPA/UHRF1/EZH2/HMGA1/CDKN2A/WDR76/INCENP/NCAPD3/CBX2	9
GO:0005876	CC	GO:0005876	spindle microtubule	9/617	81/19518	0.00102277	0.0118641	0.0100931	AURKB/KIF11/AURKA/PRC1/SKA1/CHMP4C/FAM110A/PSRC1/MISP	9
GO:0031941	CC	GO:0031941	filamentous actin	5/617	27/19518	0.00140745	0.0159283	0.0135506	PDLIM5/MYO1C/RAC3/MYO6/MYO3A	5
GO:0043034	CC	GO:0043034	costamere	4/617	18/19518	0.00212495	0.0234756	0.0199713	FLNC/SYNM/KRT19/KRT8	4
GO:0005923	CC	GO:0005923	bicellular tight junction	11/617	126/19518	0.00219663	0.0237031	0.0201649	SYNPO/ECT2/SAPCD2/CGN/TJP2/OCLN/PRKCI/EPCAM/POF1B/TJP3/MAPK15	11
GO:0031528	CC	GO:0031528	microvillus membrane	5/617	30/19518	0.00229798	0.0242333	0.0206159	EZR/CA9/S100P/PTPRH/MUC20	5
GO:0070160	CC	GO:0070160	tight junction	11/617	131/19518	0.00297985	0.0307256	0.026139	SYNPO/ECT2/SAPCD2/CGN/TJP2/OCLN/PRKCI/EPCAM/POF1B/TJP3/MAPK15	11
GO:0090575	CC	GO:0090575	RNA polymerase II transcription regulator complex	17/617	254/19518	0.00307907	0.0310584	0.0264222	HLF/PBX1/NFIL3/JUND/MAFF/MXI1/THRB/MAF/E2F1/HMGA1/E2F2/E2F8/E2F7/MXD3/NFE2L3/TCF7/MYB	17
GO:0070938	CC	GO:0070938	contractile ring	3/617	10/19518	0.00319474	0.0315396	0.0268315	PRC1/ANLN/RTKN	3
GO:0071162	CC	GO:0071162	CMG complex	3/617	11/19518	0.00429027	0.0407182	0.03464	MCM2/GINS2/GINS3	3
GO:0045177	CC	GO:0045177	apical part of cell	25/617	446/19518	0.00429998	0.0407182	0.03464	PFKM/STK26/FRMD6/FOLR1/MAL2/ASPM/SAPCD2/ITPR3/MYO5B/SPTBN2/TRPV4/EZR/LMO7/OCLN/PRKCI/EPCAM/SCNN1A/SLC22A18/SLC38A1/MYO1B/CEACAM6/PTPRH/MUC20/CEACAM5/MUC1	25
GO:0016324	CC	GO:0016324	apical plasma membrane	22/617	381/19518	0.00508213	0.0467499	0.0397713	PFKM/STK26/FRMD6/FOLR1/MAL2/ASPM/SAPCD2/SPTBN2/TRPV4/EZR/LMO7/OCLN/PRKCI/EPCAM/SCNN1A/SLC22A18/SLC38A1/CEACAM6/PTPRH/MUC20/CEACAM5/MUC1	22
GO:0043073	CC	GO:0043073	germ cell nucleus	7/617	67/19518	0.00513845	0.0467499	0.0397713	TOP2A/AURKA/RAD51/PCNA/TRIP13/TOPBP1/REC8	7
GO:0005652	CC	GO:0005652	nuclear lamina	3/617	12/19518	0.0055871	0.0489135	0.041612	LMNB1/PCNA/LMNB2	3
GO:0031261	CC	GO:0031261	DNA replication preinitiation complex	3/617	12/19518	0.0055871	0.0489135	0.041612	MCM2/GINS2/GINS3	3
GO:0001673	CC	GO:0001673	male germ cell nucleus	6/617	52/19518	0.0057704	0.0495827	0.0421813	TOP2A/RAD51/PCNA/TRIP13/TOPBP1/REC8	6
GO:0008017	MF	GO:0008017	microtubule binding	29/610	268/18369	2.43441e-08	1.82094e-05	1.75021e-05	REEP1/FES/CLIP2/MAP1LC3A/PRNP/NUSAP1/KIFC1/BIRC5/DLGAP5/KIF11/CENPF/KIF20A/PRC1/FAM83D/GTSE1/KIF23/SKA1/SPC24/KIF15/HOOK1/PSRC1/NDE1/FHDC1/TRPV4/GAPDH/EML4/KIFC2/EZR/CGN	29
GO:0015631	MF	GO:0015631	tubulin binding	34/610	374/18369	1.17916e-07	4.41004e-05	4.23876e-05	RGS2/REEP1/GABARAPL1/FES/CLIP2/MAP1LC3A/PRNP/NUSAP1/KIFC1/BIRC5/DLGAP5/KIF11/CENPF/KIF20A/PRC1/FAM83D/GTSE1/KIF23/SKA1/SPC24/KIF15/HOOK1/PSRC1/NDE1/FHDC1/TRPV4/STMN1/GAPDH/EML4/KIFC2/EZR/CCT5/CGN/HSPH1	34
GO:0001216	MF	GO:0001216	DNA-binding transcription activator activity	37/610	472/18369	1.30448e-06	0.00032525	0.000312617	OSR2/HLF/ESR1/ERG/PBX1/MSX1/GATA2/CSRNP1/SOX18/JUND/MAFF/TEF/NR4A1/FOXO4/ELK3/MEIS1/EPAS1/MAF/CREB3L1/HOXD10/MYBL2/E2F1/TFAP2A/KLF5/E2F2/OVOL2/TP73/FOXA1/EHF/MYB/SIX2/FOXD1/PAX9/LHX2/DLX3/TFCP2L1/FOXJ1	37
GO:0001228	MF	GO:0001228	DNA-binding transcription activator activity, RNA polymerase II-specific	36/610	468/18369	2.80266e-06	0.000524098	0.000503742	OSR2/HLF/ESR1/ERG/PBX1/MSX1/GATA2/CSRNP1/SOX18/JUND/MAFF/TEF/NR4A1/FOXO4/ELK3/MEIS1/EPAS1/MAF/CREB3L1/HOXD10/MYBL2/TFAP2A/KLF5/E2F2/OVOL2/TP73/FOXA1/EHF/MYB/SIX2/FOXD1/PAX9/LHX2/DLX3/TFCP2L1/FOXJ1	36
GO:0016538	MF	GO:0016538	cyclin-dependent protein serine/threonine kinase regulator activity	10/610	50/18369	4.69149e-06	0.000701846	0.000674586	CCNB2/CCNB1/CKS2/CCNA2/CDKN2A/CCNE1/CKS1B/CCNE2/CCNO/CDKN2C	10
GO:0045296	MF	GO:0045296	cadherin binding	27/610	333/18369	1.94863e-05	0.00242929	0.00233494	PDLIM5/SNX9/TES/CCNB2/CDH1/ANLN/ARHGEF16/DIAPH3/EPS8L2/ENO1/TMPO/SPTBN2/PKM/KRT18/EZR/CGN/FASN/TJP2/EPS8L1/BZW2/EPCAM/IDH1/MYO1B/S100P/PTPRH/FSCN1/GPRC5A	27
GO:0017116	MF	GO:0017116	single-stranded DNA helicase activity	6/610	23/18369	8.14787e-05	0.00870658	0.00836841	MCM2/RAD51/CHTF18/RFC4/PIF1/RFC3	6
GO:0003774	MF	GO:0003774	cytoskeletal motor activity	13/610	115/18369	0.000115294	0.00967402	0.00929827	MYO1C/KIFC1/KIF11/KIF20A/KIF23/KIF15/MYH14/MYO5B/MYO10/KIFC2/MYO6/MYO3A/MYO1B	13
GO:0000217	MF	GO:0000217	DNA secondary structure binding	7/610	35/18369	0.000128671	0.00967402	0.00929827	RAD51AP1/RECQL4/HMGA1/NEIL3/HMGB3/CLSPN/HMGB2	7
GO:0003779	MF	GO:0003779	actin binding	30/610	434/18369	0.00013367	0.00967402	0.00929827	FLNC/PDLIM5/PARVB/MYO1C/MSRB2/ABLIM3/SYNPO/ANLN/IQGAP3/MYH14/HOOK1/DIAPH3/EPS8L2/MYO5B/CORO2A/SPTBN2/FHDC1/TRPV4/MYO10/EZR/MYO6/CGN/EPS8L1/PLS1/NEBL/POF1B/MISP/MYO3A/MYO1B/FSCN1	30
GO:0051015	MF	GO:0051015	actin filament binding	18/610	202/18369	0.000144437	0.00967402	0.00929827	FLNC/MYO1C/ABLIM3/IQGAP3/MYH14/MYO5B/CORO2A/SPTBN2/TRPV4/MYO10/EZR/MYO6/PLS1/NEBL/POF1B/MISP/MYO1B/FSCN1	18
GO:0000146	MF	GO:0000146	microfilament motor activity	7/610	36/18369	0.000155198	0.00967402	0.00929827	MYO1C/MYH14/MYO5B/MYO10/MYO6/MYO3A/MYO1B	7
GO:0008301	MF	GO:0008301	DNA binding, bending	5/610	18/18369	0.000237561	0.0136689	0.013138	TOP2A/HMGA1/HMGB3/FOXD1/HMGB2	5
GO:0001221	MF	GO:0001221	transcription coregulator binding	12/610	111/18369	0.000318367	0.0170099	0.0163492	ESR1/PBX1/GATA2/SMARCD3/LMO2/JUND/THRB/PER1/EPAS1/EZH2/HMGA1/ENO1	12
GO:0005516	MF	GO:0005516	calmodulin binding	17/610	200/18369	0.000381795	0.0190388	0.0182994	WFS1/RGS2/ATP2B4/NRGN/MYO1C/TPRG1L/IQGAP3/ASPM/MYH14/MYO5B/TRPV4/MYO10/MYO6/ITPKA/MYO3A/MYO1B/KCNN4	17
GO:0003678	MF	GO:0003678	DNA helicase activity	8/610	58/18369	0.0006261	0.0292702	0.0281333	MCM2/RAD51/RECQL4/CHTF18/RFC4/PIF1/DDX11/RFC3	8
