# Supplementary material for: Ferroptosis-related gene transferrin receptor protein 1 expression correlates with the prognosis and tumor immune microenvironment in cervical cancer
Source: PeerJ. 2024 Aug 6;12:e17842. doi: 10.7717/peerj.17842 (PMC11313409; doi:10.7717/peerj.17842)
Supplement: Supplemental Information 3 [file peerj-12-17842-s003.xlsx]

## Sheet: Sheet1
	ID	Description	GeneRatio	BgRatio	pvalue	p.adjust	qvalue	geneID	Count
hsa04110	hsa04110	Cell cycle	28/312	158/8840	9.82563e-13	2.87891e-10	2.66843e-10	GADD45G/CDC20/CCNB2/CCNB1/AURKB/PTTG1/CDT1/BUB1B/CCNA2/TTK/MCM2/E2F1/PKMYT1/CDKN2A/CCNE1/PCNA/CDC25A/TRIP13/E2F2/TICRR/SKP2/DDX11/CCNE2/PRKDC/FBXO5/SMC1B/CDC25B/CDKN2C	28
hsa04115	hsa04115	p53 signaling pathway	14/312	75/8840	2.78949e-07	4.08661e-05	3.78784e-05	GADD45G/SESN1/SESN3/IGFBP3/RRM2/CCNB2/CCNB1/GTSE1/CDKN2A/CCNE1/TP73/CCNE2/STEAP3/PIDD1	14
hsa04218	hsa04218	Cellular senescence	20/312	157/8840	5.8499e-07	5.7134e-05	5.2957e-05	GADD45G/RRAS/ZFP36L2/MAPK11/IGFBP3/MYBL2/CCNB2/CCNB1/FOXM1/CCNA2/E2F1/CDKN2A/CCNE1/CDC25A/E2F2/ITPR3/CCNE2/TRPV4/SLC25A5/EIF4EBP1	20
hsa00480	hsa00480	Glutathione metabolism	9/312	58/8840	0.00017553	0.0125687	0.0116498	GSTM3/GPX3/RRM2/IDH2/RRM1/CHAC2/GSTP1/IDH1/ANPEP	9
hsa01200	hsa01200	Carbon metabolism	13/312	116/8840	0.000214482	0.0125687	0.0116498	ACAT1/H6PD/PFKM/PSAT1/ENO1/IDH2/PKM/GPT2/GAPDH/PSPH/GPI/ACAT2/IDH1	13
hsa01230	hsa01230	Biosynthesis of amino acids	10/312	75/8840	0.000280838	0.0137142	0.0127116	PFKM/PSAT1/ENO1/IDH2/PKM/GPT2/GAPDH/PSPH/IDH1/PYCR1	10
hsa04114	hsa04114	Oocyte meiosis	14/312	139/8840	0.000380781	0.0159384	0.0147731	RPS6KA2/MAPK11/CDC20/CCNB2/CCNB1/PTTG1/AURKA/PKMYT1/CCNE1/ITPR3/CCNE2/FBXO5/SMC1B/REC8	14
