# Supplementary material for: Ferroptosis-related gene transferrin receptor protein 1 expression correlates with the prognosis and tumor immune microenvironment in cervical cancer
Source: PeerJ. 2024 Aug 6;12:e17842. doi: 10.7717/peerj.17842 (PMC11313409; doi:10.7717/peerj.17842)
Supplement: Supplemental Information 4 [file peerj-12-17842-s004.xls]

## Sheet: Sheet1
ITEM TO CHECK	IMPORTANCE	CHECKLIST
EXPERIMENTAL DESIGN
Definition of experimental and control groups	E	Line2-3
Number within each group	E	Line4
Assay carried out by core lab or investigator's lab?	D
Acknowledgement of authors' contributions	D
SAMPLE
Description	E	Line6
Volume/mass of sample processed	D
Microdissection or macrodissection	E	Line6
Processing procedure	E	Line7
If frozen - how and how quickly?	E	Line7
If fixed - with what, how quickly?	E	Line7
Sample storage conditions and duration (especially for FFPE samples)	E	Line7-8
NUCLEIC ACID EXTRACTION
Procedure and/or instrumentation	E	Line10
Name of kit and details of any modifications	E	Line10-11
Source of additional reagents used	D
Details of DNase or RNAse treatment	E	Line11-12
Contamination assessment (DNA or RNA)	E	Line13
Nucleic acid quantification	E	Lin14-15
Instrument and method	E	Line14-15
Purity (A260/A280)	D
Yield	D
RNA integrity method/instrument	E	Line15-17
RIN/RQI or Cq of 3' and 5' transcripts	E	Line18
Electrophoresis traces	D
Inhibition testing (Cq dilutions, spike or other)	E	Line19-21
REVERSE TRANSCRIPTION
Complete reaction conditions	E	Line23-26
Amount of RNA and reaction volume	E	Line23
Priming oligonucleotide (if using GSP) and concentration	E	Line27
Reverse transcriptase and concentration	E	Line28
Temperature and time	E	Line26
Manufacturer of reagents and catalogue numbers	D
Cqs with and without RT	D*
Storage conditions of cDNA	D
qPCR TARGET INFORMATION
If multiplex, efficiency and LOD of each assay.	E	Line30
Sequence accession number	E	Line31
Location of amplicon	D
Amplicon length	E	Line32
In silico specificity screen (BLAST, etc)	E	Line33
Pseudogenes, retropseudogenes or other homologs?	D
Sequence alignment	D
Secondary structure analysis of amplicon	D
Location of each primer by exon or intron (if applicable)	E	Line34-35
What splice variants are targeted?	E	Line34-35
qPCR OLIGONUCLEOTIDES
Primer sequences	E	Line37-39
RTPrimerDB Identification Number	D
Probe sequences	D**
Location and identity of any modifications	E	Line39
Manufacturer of oligonucleotides	D
Purification method	D
qPCR PROTOCOL
Complete reaction conditions	E	Line41
Reaction volume and amount of cDNA/DNA	E	Line41
Primer, (probe), Mg++ and dNTP concentrations	E	Line42-43
Polymerase identity and concentration	E	Line42-43
Buffer/kit identity and manufacturer	E	Line44
Exact chemical constitution of the buffer	D
Additives (SYBR Green I, DMSO, etc.)	E	Line41
Manufacturer of plates/tubes and catalog number	D
Complete thermocycling parameters	E	Line41
Reaction setup (manual/robotic)	D
Manufacturer of qPCR instrument	E	Line45
qPCR VALIDATION
Evidence of optimisation (from gradients)	D
Specificity (gel, sequence, melt, or digest)	E	Line47
For SYBR Green I, Cq of the NTC	E	Line47-48
Standard curves with slope and y-intercept	E	Line48
PCR efficiency calculated from slope	E	Line48-49
Confidence interval for PCR efficiency or standard error	D
r2 of standard curve	E	Line49
Linear dynamic range	E	Line49-50
Cq variation at lower limit	E	Line50-51
Confidence intervals throughout range	D
Evidence for limit of detection	E	Line50
If multiplex, efficiency and LOD of each assay.	E	Line51
DATA ANALYSIS
qPCR analysis program (source, version)	E	Line53-54
Cq method determination	E	Line54-55
Outlier identification and disposition	E	Line55-56
Results of NTCs	E	Line56
Justification of number and choice of reference genes	E	Line57
Description of normalisation method	E	Line57-58
Number and concordance of biological replicates	D
Number and stage (RT or qPCR) of technical replicates	E	Line58
Repeatability (intra-assay variation)	E	Line58
Reproducibility (inter-assay variation, %CV)	D
Power analysis	D
Statistical methods for result significance	E	Line59
Software (source, version)	E	Line59
Cq or raw data submission using RDML	D
Table 1. MIQE checklist for authors, reviewers and editors. All essential information (E) must be submitted with the manuscript. Desirable
information (D) should be submitted if available. If using primers obtained from RTPrimerDB, information on qPCR target, oligonucleotides,
protocols and validation is available from that source.
*: Assessing the absence of DNA using a no RT assay is essential when first extracting RNA. Once the sample has been validated as
RDNA-free, inclusion of a no-RT control is desirable, but no longer essential.
**: Disclosure of the probe sequence is highly desirable and strongly encouraged. However, since not all commercial pre-designed assay
vendors provide this information, it cannot be an essential requirement. Use of such assays is advised against.
